# Supplementary material for: The importance of cognitive diversity for sustaining the commons
Source: PubMed Central journal article supplement (PMC6382855; doi:10.1038/s41467-019-08549-8), 2019-02-20
Supplement: 41467_2019_8549_MOESM1_ESM.pdf [file 41467_2019_8549_MOESM1_ESM.pdf]

# The importance of cognitive diversity for sustaining the commons

Baggio et al.

January 10, 2019

## 1 Supplementary Note 1

### 1.1 $g$ and $ToM$

General intelligence  $g$  and theory of mind  $ToM$  are considered different but related concepts. Both  $g$  and  $ToM$  are necessary in order to solve complex problems both at the individual level and within groups.  $g$  and  $ToM$  relate to functionally different cognitive abilities.

$g$  was measured via ACT scores. The ACT is a college admission test that is widely used in the U.S.A. The ACT correlates (although only moderately) with college GPA, and strongly with SAT (another test widely used in college admissions throughout the U.S.A. [1]).

$ToM$  was measured using the Short Story Test (SST) as proposed by Dodell-Feder and colleagues [2]. The SST allows one to elicit if and how well participants infer the thoughts and emotions of characters in a short story. In other words, the SST estimates the ability of individuals to infer others' intentions and feelings and thus relates to social-cognitive theory of mind [2]. The SST is often used to predict social communications disorders, communication errors, and inferring mental states of others [2].

SST (our measure of  $ToM$ ) relates to social-cognitive processes and thus should be related to  $g$ . However, in our experimental study we only find a weak correlation between  $ToM$  and  $g$  as reported below.

|            | $min(ToM)$ | $avg(ToM)$ | $avg(g)$ | $min(g)$ |
|------------|------------|------------|----------|----------|
| $min(ToM)$ | 1.0000     |            |          |          |
| $avg(ToM)$ | 0.7927     | 1.0000     |          |          |
| $avg(g)$   | 0.2930     | 0.2908     | 1.0000   |          |
| $min(g)$   | 0.3158     | 0.2356     | 0.7960   | 1.0000   |

## 1.2 Ostrom Institutional Design Principles

Hardin’s seminal paper on the tragedy of the commons [3] prescribed strong state control or the establishment of private property rights as the only two ways to avoid resource depletion in the case of common pool resources (i.e., resources shared by a community). Since then, however, numerous studies have shown that under specific conditions resource users are able to maintain resources sustainably [4, 5, 6, 7, 8, 9]. Generally speaking, communities with high trust and reciprocity, as well as the ability to understand resource dynamics, are able to devise rules and norms that can favor collective action and reduce or prevent the depletion of resources [6]. The ability of communities to build such rules and norms is enhanced by the presence of specific characteristics or institutional design principles [6, 9, 7]. More specifically, eight principles are put forth by Ostrom and re-classified by Cox and colleagues [9]:

1. **Boundaries:** Clearly defined boundaries both around the community of users (who has rights to withdraw/harvest common resources) **and** the resource itself (i.e. an irrigation system, a forest, fishery ground etc.).
2. **Congruence:** There should be congruence between rules of harvest and local resource conditions, **and** there should be proportionality between how much one can harvest from the common resources and how much one invest or help providing that very same resource (working maintaining canals, fish gear, forest patches etc.).
3. **Collective choice arrangement:** Ability for community members to participate and modify the rules that govern the common resources.

- 42 4. Monitoring: Communities should be able to monitor behavior of those who have access  
43 to the common resources **and** monitor the monitors.
- 44 5. Graduate sanctions: Sanctions should be proportionate to the severity and repetition of  
45 rule violations
- 46 6. Conflict resolution: Communities should able to solve (at low cost) conflicts that may  
47 arise within the community, especially in relation to the appropriation of common re-  
48 sources
- 49 7. Minimum rights recognition: communities should be able to effectively create their own  
50 institutions (rules and norms) without being continuously challenged by higher hierarchi-  
51 cal authorities
- 52 8. Nestedness: Governance activities should be organized in different layers from local to  
53 regional to state to international.

54 These design principles indeed increase the likelihood that communities successfully and  
55 sustainably manage resources (with a few exceptions) [7, 8]. All these design principles relate  
56 to the ability of communities to devise rules and norms that aid in the sustainable management  
57 of resources. The ability of groups to devise such institutional principles is underpinned by  
58 their ability to effectively negotiate and communicate, and reduce conflict and understand the  
59 resource dynamics (local conditions), which are underpinned by group cognitive abilities

## 60 **2 Supplementary Note 2**

### 61 **2.1 Basic Statistics**

62 Distributions and descriptive statistics for the data used are depicted below. The age distribution  
63 is consistent with that expected from a sample of undergraduate students. Individuals partici-

64 pating in the experiments are mainly majoring in social and behavioral sciences (social science  
65 and psychology).

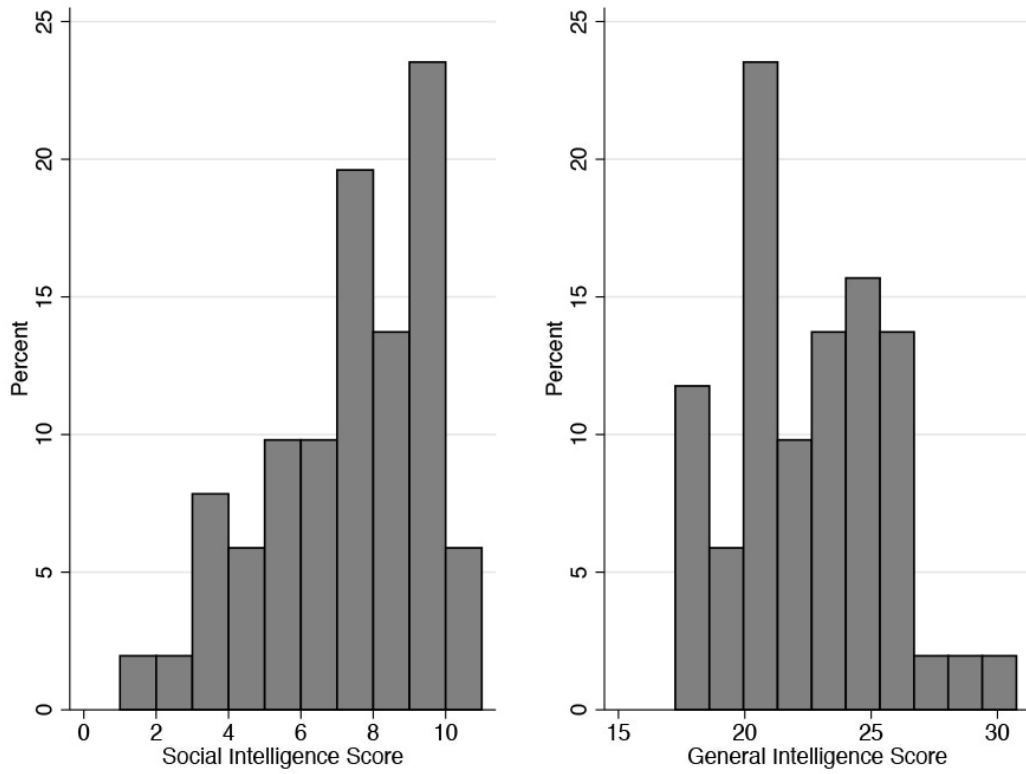

Figure 1: Distribution of social and general intelligence between groups. Social intelligence is derived from the SST test, general intelligence is scaled with respect to ACT scores - see methods in the main paper.

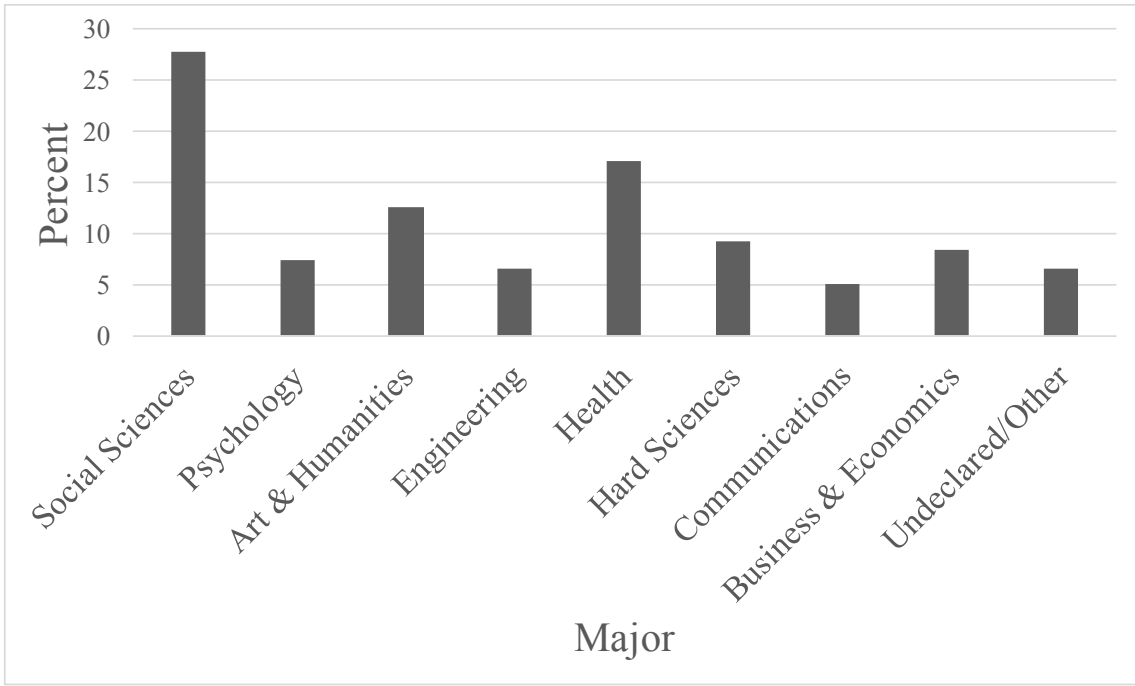

Figure 2: Declared majors of participating individuals

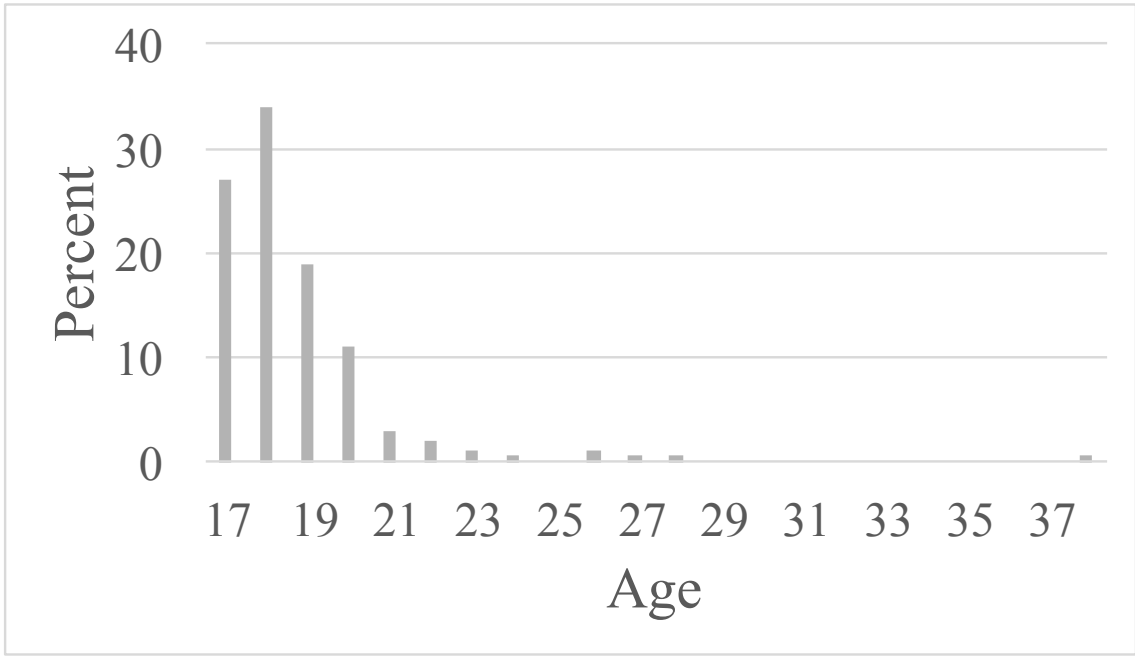

Figure 3: Age distribution of individuals participating in the experiments

Table 1: Descriptive Statistics for all variable used in the analysis

| Variable             | Mean  | StDev | Median | 25 <sup>th</sup> % | 75 <sup>th</sup> % | Min   | Max   |
|----------------------|-------|-------|--------|--------------------|--------------------|-------|-------|
| General Intelligence | 22.46 | 2.98  | 22.33  | 20.25              | 24.75              | 17.25 | 30.75 |
| Social Intelligence  | 6.85  | 2.28  | 7.00   | 5.00               | 9.00               | 1.00  | 11.00 |
| Trust                | -0.71 | 1.93  | -1.00  | -2.00              | 1.00               | -4.00 | 3.00  |
| Avg Chat Volume      | 6.49  | 4.06  | 6.00   | 3.00               | 9.00               | 0.00  | 19.00 |
| Ethnic Diversity     | 0.52  | 0.44  | 0.56   | 0.00               | 1.04               | 0.00  | 1.39  |
| Religious Diversity  | 0.82  | 0.43  | 0.87   | 0.56               | 1.04               | 0.00  | 1.39  |
| % Males              | 0.58  | 0.21  | 0.50   | 0.50               | 0.75               | 0.25  | 1.00  |

66 Table 1 portrays the descriptive statistics (mean, median, standard deviation, 25th and 75th  
67 percentiles, minimum and maximum) of all variables used in the analysis.

## 68 2.2 External Validity of our Sample

69 All experimental studies have issues with external validity, more so if performed in a west-  
70 ern university with an undergraduate population. We compare here our average results with  
71 the wider U.S. population using data available from the Gallup Report for 2016 available at  
72 <https://news.gallup.com/poll/200186/five-key-findings-religion.aspx>. We find that our religious  
73 diversity is very much in line with the average religious diversity within the wider U.S. pop-  
74 ulation. In fact, our average religious diversity metric 0.82 (see table 1 in the supplementary  
75 material) is very similar to the average religious diversity metrics of the U.S. when all Chris-  
76 tian religions are considered together (0.84), albeit lower when different Christian religions are  
77 separated, as diversity then increases to 1.38 for the U.S. population.

78 Comparing the ethnic diversity of our sample size with the wider U.S. population we find  
79 that our sample composition is more homogeneous than the overall U.S. population, however,  
80 this also reflects the inbuilt biases that exist within the U.S. college population. In fact, while  
81 our ethnic diversity index (calculated as described in the main paper, method section) is = 0.53  
82 on average, the U.S. population ethnic diversity index (dividing white and Hispanics) is = 1.1 –  
83 almost double. However, if we look at the % of individuals within each diversity index value,

84 while most groups are very homogeneous, over 30% of our groups reflect the overall U.S.  
85 average as shown below.

| Ethnic Diversity Index | Percent |
|------------------------|---------|
| 0                      | 36.54   |
| 0.5623351              | 25.00   |
| 0.6931472              | 7.69    |
| 1.039721               | 28.85   |
| 1.386294               | 1.92    |

86 With respect to age, our sample is definitely skewed compared to the wider population given  
87 the age restriction and inbuilt bias that exist when sampling undergraduate students.

88 Unfortunately, no state level data are available for ToM. In a previous study, Freeman and  
89 colleagues [10] used agreeableness as a proxy for ToM. The metric we use in this study, based  
90 on a specific reasoning test, and the agreeableness metric Freeman et al. [10] are moderately  
91 correlated (see also [11] where a British version of the SST was correlated with agreeableness).  
92 However, as expected, our sample has a narrower spreading as well as higher g compared to  
93 population average with respect to the U.S.

## 94 **3 Supplementary Method 1**

95 The following sections report the model output that was used to calculate the marginal effects  
96 portrayed in Figures 2, 3 and 4 of the main paper, as well as additional analyses to assess  
97 whether the results may be a construct of the aggregation of individual cognitive abilities cho-  
98 sen. We first describes the simulations that we conducted to construct the response variables  
99  $\Delta T$  and  $avgT$ . Supplementary Method 2 describes the regression outputs portrayed in Figure  
100 2 and 3 of the main paper. Supplementary Method 3 presents the results of regressions that ex-  
101 amine the three-way interaction effects between  $g$ ,  $ToM$  and ecological *change*. These models  
102 exclude the control variables because it is difficult to interpret three-way interaction effects, and  
103 fewer variables increases the robustness of interpretation. Note that we compare the three-way  
104 regressions with the two-way interaction regression that include control variables and observe  
105 consistent results. Finally, Supplementary Method 4 showcases results for the same models  
106 presented in Supplementary Method 2 but where  $g$  and  $ToM$  were aggregated differently using  
107  $avg(ToM)$  and  $min(g)$ .

### 108 **3.1 Simulations**

109 Two of our response variables depend on calculating the “optimal” number of potential tokens  
110 that a group could harvest, if that group followed the best cooperative protocol for harvesting  
111 tokens in the experimental environment. These response variables are  $\Delta T$  and  $avgT$ .

112  $\Delta T$  computes the difference between the percentage of potential tokens collected in the  
113 first and second three rounds of each treatment. For instance, hypothetically, in the high-to-low  
114 treatment, if, on average, the maximum number of tokens that could be collected in rounds 1-3  
115 was 100, and a group collected 50, the group would have a collected 50% of potential tokens.  
116 In the second three rounds with a lower growth rate, if the group collected 40/50 tokens, they  
117 would have collected 80% of tokens. In this example,  $\Delta T = 50\% - 80\% = -30\%$ . This is a



118 very low value not seen in our experiment and would indicate that the group, after the negative  
119 ecological change, more readily followed the best cooperative protocol (described below) for  
120 harvesting resources after the negative change to growth rate. In contrast, positive values of  $\Delta T$   
121 indicate that groups less readily followed the best cooperative protocol and either collapsed or  
122 severely depressed the resource after the ecological change.

123  $avgT$  is calculated by averaging the % of tokens collected individually for each round. More  
124 formally we calculate  $avgT = \frac{\sum T_i}{MaxT}$  where  $\sum T_i$  = sum of tokens collected by each individual  
125 of a specific group, and  $MaxT$  = maximum number of potential token calculated via simulating  
126 an optimized token collection. The interpretation of this variable is intuitive. The higher the  
127 percentage, the more closely a group approximated the best cooperative protocol for harvesting  
128 tokens described by the simulation below.

129 To simulate the optimal harvest of tokens we created a 20X20 grid, of which 15% of cells  
130 are filled with tokens. Initially, simulated agents are placed in the middle row of the grid with  
131 equal distances between them. The setup of the simulation accurately resembles the start of  
132 an experimental round. Available actions for an agent in one step include move up, down,  
133 left, right, and collect a token. Simulated agents must move to the cell that contains a token  
134 and explicitly press the space bar to collect that token. Agents are allowed to have at most 10  
135 actions per second. Agents are not allowed to overlap in a cell, which means an agent cannot  
136 move to a cell that is already occupied by another agent. The length of each round is 180  
137 seconds. During a round, the complete information about the spatial position of tokens and  
138 actions of other members is available for an agent. Agents also have access to the number of  
139 tokens collected by other players while playing a round. An empty cell has a probability  $p_t$  of  
140 generating a new token.  $p_t$  is density-dependent on the number of adjacent cells with tokens.  
141  $p_t = p \times \frac{n_t}{N}$ , where  $n_t$  is the number of adjacent cells containing a token,  $N$  is the number of  
142 adjacent cells ( $N = 8$ ). The control probability  $p$  is set to 0.01 in the “high” configuration, and

143 0.05 in the “low” configuration. An empty cell surrounded with more tokens will have higher  
144 probability of generating a token compared to a cell surrounded by fewer tokens. A cell must  
145 have at least one adjacent cell filled with a token in order for a new token generation to appear.  
146 Thus, if agents collect all tokens in the grid, no additional token generation will occur.

147 The optimum level of collecting tokens depends on the initial starting conditions, the gen-  
148 erating probabilities and the spatial variability of tokens. In theory, if we ignore the spatial  
149 variability, the optimal strategy is defined by a two step strategy: (1) Wait until the tokens  
150 grow to 50% density, which leads to the highest growth rate, and harvest at a rate that keeps  
151 the resource at a 50% density. (2) At the point where there is just enough time left to harvest  
152 every single token, harvest all of the tokens before time runs out. However, in our simulation,  
153 the number of tokens collected is also dependent on the spatial variability of the tokens. To  
154 calculate a distribution of the maximum number of tokens collected we performed 4,000 simu-  
155 lation rounds (2,000 for each type of configuration “high and low”) using the same strategy to  
156 maximize earnings as in previous research [12]. The strategy is described as follows.

157 At the beginning of a round, agents wait until the resource grows to 50% density. After  
158 that at each unit time (seconds) tokens with four tokens or more on the neighboring cells are  
159 collected, using a randomized non-sequential updating of the tokens. Tokens are collected but  
160 the harvesting rate keeps the resource at a 50% density. Our experimental settings does not  
161 allow more than 10 actions per second per agent, thus the maximum number of tokens collected  
162 per second is 40 for a four agent experiment. At the end of the experiment, tokens are collected  
163 such that not more than  $40 * (secondsremaining)$  tokens remain on the screen. When clearing  
164 the grid, agents always move to the nearest token to collect. The following figure portrays the  
165 pseudocode for the simulation.

166 Because the initial token distribution and the control probability are small in our experiment,  
167 the number of tokens never reaches 50% density in the “low” configuration. Thus, the optimal

```

while TRUE do
  if The round is about to finish then
    Collect all remaining tokens in the grid
    Break
  end if
  if The number of tokens < 50% then
    Wait
  else
    while The number of tokens  $\geq$  50% do
      Collect tokens with four tokens or more on the neighboring cells
    end while
  end if
end while

```

Figure 4: Simulation pseudocode

168 strategy is simply to wait until the number of moves possible (10 moves per second) is just  
 169 sufficient to collect all of the tokens on the grid. Figure 5 shows the histogram of the number  
 170 of tokens collected in a round at the group level in the “low” configuration. We use the *max* of  
 171 this distribution to approximate the optimal number of tokens harvested per group per round.  
 172 Thus, the optimal number of collected tokens per group per round for the “low” configuration  
 173 is 145, which means, at maximum, an agent collects 23.25 tokens. Figure 6 shows the result for  
 174 the “high” configuration. On average, the optimal number of tokens collected at the group level  
 175 in the “high” configuration is 220, or 55 tokens maximum per agent.

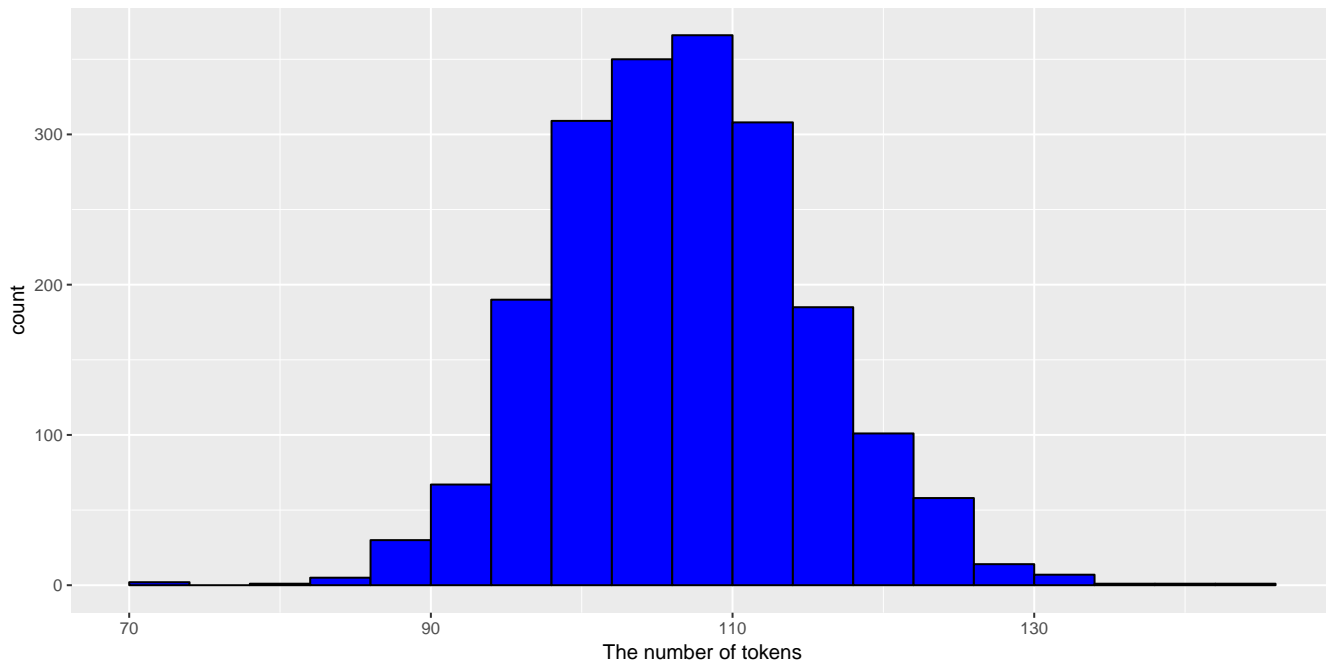

Figure 5: Simulation result for “low” configuration

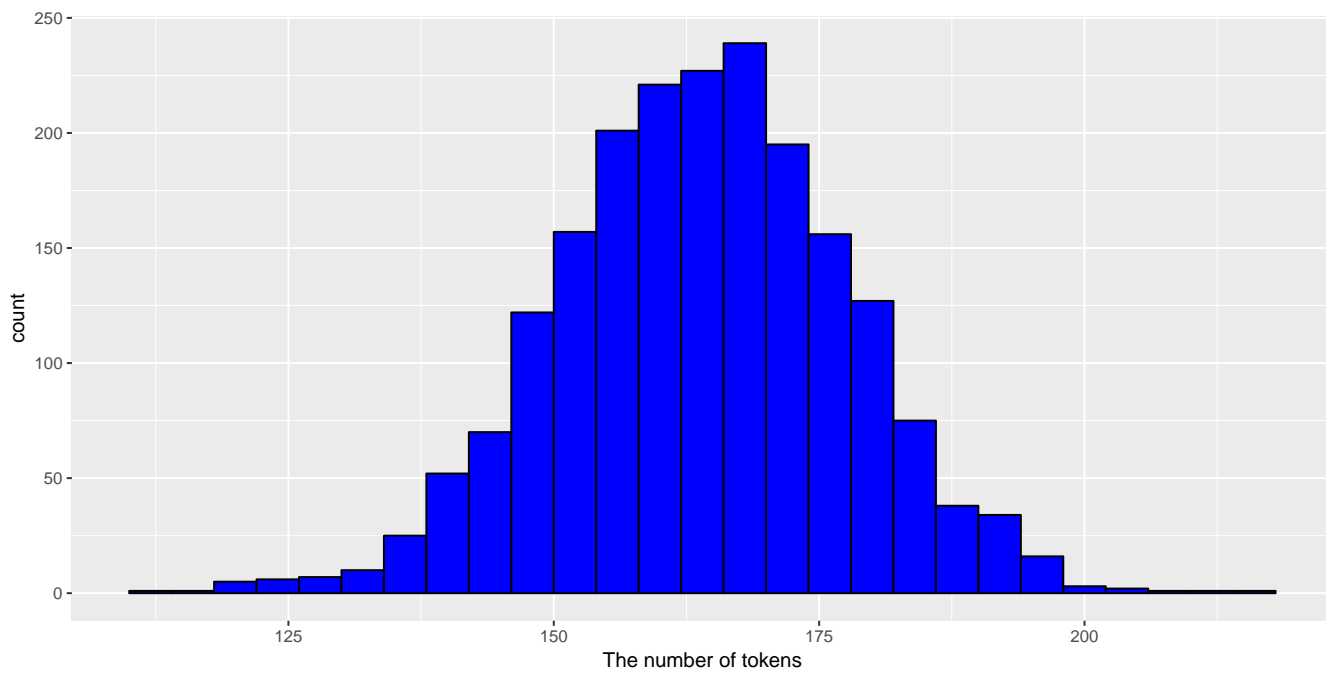

Figure 6: Simulation result for “high” configuration

## 176 **4 Supplementary Method 2**

### 177 **4.1 Two way interaction effect regressions**

178 Table 2 reports the statistical model output and factors affecting *Time*. With respect to *Time*,  
179 when conditions worsen - HL treatment - both *ToM* and *g* are always positive, meaning that  
180 taken singularly they increase the probability of quickly collapsing the resources and thus in-  
181 crease the time “spent staring at an empty screen”. However, the interaction between *g* and  
182 *ToM* is negative, suggesting that the interplay between the different cognitive abilities reduces  
183 the probability of quickly collapsing resources. In the HL treatment, the interaction of *g* and  
184 *ToM* is always significant, as well as *ToM*, while *g* is significant in 4 out of 6 cases.

185 On the other hand, when conditions improve - LH treatment - *g* alone, on average, increases  
186 the probability of collapsing resources, while *ToM* alone decreases it. Once again, the in-  
187 teraction of *g* and *ToM* decreases the probability of quickly collapsing resources. However,  
188 notwithstanding the direction (positive/negative) and the average effect of both *g* and *ToM*,  
189 when conditions improve (LH models) cognitive abilities do not to have a statistically sig-  
190 nificant effect on the probability of quickly collapsing resources. When conditions improve,  
191 reciprocity—what happened in the previous round—is the main factor driving increases/decreases  
192 in the probability of quickly collapsing resources.

Table 2: General Linear Model: Individual cognitive abilities and controlling factors on *Time*

| Predictors               | HL11                 | HL12                 | HL13                 | HL14                 | HL15                 | HL16                 | LH11                 | LH12                 | LH13                 | LH14                 | LH15                 | LH16                 |
|--------------------------|----------------------|----------------------|----------------------|----------------------|----------------------|----------------------|----------------------|----------------------|----------------------|----------------------|----------------------|----------------------|
| <i>min(ToM)</i>          | 0.925*<br>(0.483)    | 0.925*<br>(0.484)    | 0.829<br>(0.540)     | 0.867*<br>(0.514)    | 1.210**<br>(0.476)   | 1.309***<br>(0.501)  | 0.213<br>(0.591)     | 0.254<br>(0.584)     | 0.258<br>(0.598)     | 0.208<br>(0.611)     | 0.181<br>(0.620)     | 0.224<br>(0.612)     |
| <i>avg(g)</i>            | 0.278*<br>(0.145)    | 0.278*<br>(0.144)    | 0.237<br>(0.168)     | 0.240<br>(0.162)     | 0.362**<br>(0.157)   | 0.404**<br>(0.163)   | -0.078<br>(0.182)    | -0.065<br>(0.179)    | -0.062<br>(0.192)    | -0.038<br>(0.192)    | -0.040<br>(0.194)    | -0.028<br>(0.194)    |
| <i>avg(g) * min(ToM)</i> | -0.058***<br>(0.022) | -0.058***<br>(0.022) | -0.054**<br>(0.024)  | -0.056**<br>(0.023)  | -0.072***<br>(0.022) | -0.077***<br>(0.023) | -0.008<br>(0.027)    | -0.010<br>(0.027)    | -0.010<br>(0.027)    | -0.009<br>(0.028)    | -0.007<br>(0.028)    | -0.009<br>(0.028)    |
| Round 1 Baseline         | 0.000<br>(.)         | 0.000<br>(.)         | 0.000<br>(.)         | 0.000<br>(.)         | 0.000<br>(.)         | 0.000<br>(.)         | 0.000<br>(.)         | 0.000<br>(.)         | 0.000<br>(.)         | 0.000<br>(.)         | 0.000<br>(.)         | 0.000<br>(.)         |
| Round 2                  | -1.384***<br>(0.434) | -1.392***<br>(0.442) | -1.386***<br>(0.442) | -1.394***<br>(0.444) | -1.480***<br>(0.419) | -1.505***<br>(0.418) | -1.519***<br>(0.461) | -1.333***<br>(0.494) | -1.333***<br>(0.494) | -1.288***<br>(0.498) | -1.284***<br>(0.495) | -1.306***<br>(0.494) |
| Round 3                  | -1.715***<br>(0.460) | -1.726***<br>(0.496) | -1.719***<br>(0.494) | -1.728***<br>(0.493) | -1.836***<br>(0.461) | -1.868***<br>(0.456) | -1.230***<br>(0.413) | -1.060**<br>(0.441)  | -1.060**<br>(0.441)  | -1.018**<br>(0.446)  | -1.016**<br>(0.452)  | -1.036**<br>(0.458)  |
| Round 4                  | -1.558***<br>(0.457) | -1.569***<br>(0.452) | -1.562***<br>(0.452) | -1.571***<br>(0.458) | -1.676***<br>(0.443) | -1.709***<br>(0.422) | -1.963***<br>(0.440) | -1.859***<br>(0.452) | -1.859***<br>(0.452) | -1.837***<br>(0.457) | -1.838***<br>(0.453) | -1.852***<br>(0.456) |
| Round 5                  | -1.891***<br>(0.388) | -1.902***<br>(0.408) | -1.895***<br>(0.407) | -1.904***<br>(0.409) | -2.019***<br>(0.388) | -2.053***<br>(0.381) | -2.293***<br>(0.448) | -2.183***<br>(0.461) | -2.182***<br>(0.461) | -2.159***<br>(0.470) | -2.157***<br>(0.469) | -2.173***<br>(0.473) |
| Round 6                  | -2.276***<br>(0.417) | -2.286***<br>(0.451) | -2.280***<br>(0.450) | -2.288***<br>(0.453) | -2.405***<br>(0.452) | -2.435***<br>(0.451) | -2.415***<br>(0.493) | -2.355***<br>(0.493) | -2.355***<br>(0.493) | -2.345***<br>(0.502) | -2.343***<br>(0.504) | -2.352***<br>(0.509) |
| Chat                     |                      | 0.002<br>(0.043)     | 0.001<br>(0.042)     | 0.002<br>(0.042)     | 0.015<br>(0.039)     | 0.022<br>(0.038)     |                      | -0.045<br>(0.039)    | -0.045<br>(0.039)    | -0.058<br>(0.040)    | -0.059<br>(0.040)    | -0.054<br>(0.045)    |
| Trust                    |                      |                      | 0.046<br>(0.092)     | 0.049<br>(0.090)     | 0.129<br>(0.092)     | 0.113<br>(0.089)     |                      |                      | -0.004<br>(0.085)    | -0.017<br>(0.085)    | -0.005<br>(0.088)    | 0.006<br>(0.097)     |
| Religious Diversity      |                      |                      |                      | -0.247<br>(0.334)    | -1.123***<br>(0.421) | -1.437**<br>(0.576)  |                      |                      |                      | 0.507<br>(0.391)     | 0.341<br>(0.506)     | 0.329<br>(0.514)     |
| Ethnic Diversity         |                      |                      |                      |                      | 1.414***<br>(0.430)  | 1.608***<br>(0.538)  |                      |                      |                      |                      | 0.296<br>(0.450)     | 0.274<br>(0.443)     |
| Gender                   |                      |                      |                      |                      | 0.670<br>(0.772)     | 0.670<br>(0.772)     |                      |                      |                      |                      |                      | 0.267<br>(0.930)     |
| Constant                 | -4.126<br>(3.147)    | -4.143<br>(3.164)    | -3.185<br>(3.667)    | -3.018<br>(3.551)    | -5.683*<br>(3.374)   | -6.742*<br>(3.602)   | 1.445<br>(3.963)     | 1.319<br>(3.886)     | 1.255<br>(4.213)     | 0.532<br>(4.210)     | 0.490<br>(4.233)     | 0.092<br>(4.305)     |
| N                        | 162                  | 162                  | 162                  | 162                  | 162                  | 162                  | 150                  | 150                  | 150                  | 150                  | 150                  | 150                  |
| AIC                      | 104.320              | 106.318              | 108.242              | 110.096              | 109.395              | 111.187              | 127.728              | 129.199              | 131.199              | 132.579              | 134.396              | 136.359              |
| D                        | 0.215                | 0.217                | 0.218                | 0.218                | 0.202                | 0.202                | 0.385                | 0.384                | 0.387                | 0.385                | 0.387                | 0.390                |

Note: Robust standard errors reported in parenthesis \* = significant at the 90% level, \*\* = significant at the 95% level, and \*\*\* = significant at the 99% level. Round 1 = baseline to which other rounds are compared to. HLr1 to HLr6 represent 6 regression equations estimated hierarchically, adding one new predictor for each equation, for the condition in which participants go from high to low resource growth rates. LH r1 to LHr6 represent the condition in which participants go from low to high resource growth rates.

193 Table 3 portrays the statistical model output and factors affecting  $\Delta T$ . With respect to  $\Delta T$ ,  
 194 we observe the same results as with respect to *Time*. Groups with high *ToM* or *g* alone are  
 195 more likely to increase harvest pressure after a change in resource regrowth and thus over-  
 196 harvest (i.e., collect tokens faster than the regrowth rate). Cognitive abilities are statistically  
 197 significant in the case of pejorative conditions - HL treatment - and in case of improved condi-  
 198 tions -LH treatment -. In all cases, *ToM* and *g* alone increase pressure on natural resources  
 199 after conditions either deteriorate or improve. That is, both *g* and *ToM* display positive signs  
 200 (increase in *g* or *ToM* increases  $\Delta T$  and hence increases pressure on resources after a change).  
 201 On the other hand, the interaction between *g* and *ToM* reduces pressure on resources (negative  
 202 sign).

203 Groups with high *ToM* or *g* are more prone to increase harvest pressure after a change  
 204 in resource regrowth, hence reducing the ability of groups to harvest resources sustainably,  
 205 especially in case of a pejorative change (see also Figures 2 and 3 in the main paper and Tables  
 206 2 and 3).

Table 3: OLS Regression: Individual cognitive abilities and controlling factor on  $\Delta T$

| Predictors               | HLr1                 | HLr2                 | HLr3                 | HLr4                 | HLr5                 | HLr6                 | LHr1                 | LHr2                 | LHr3                 | LHr4                 | LHr5                 | LHr6                 |
|--------------------------|----------------------|----------------------|----------------------|----------------------|----------------------|----------------------|----------------------|----------------------|----------------------|----------------------|----------------------|----------------------|
| <i>min(ToM)</i>          | 0.065***<br>(0.015)  | 0.065***<br>(0.015)  | 0.096***<br>(0.012)  | 0.096***<br>(0.011)  | 0.096***<br>(0.012)  | 0.101***<br>(0.012)  | 0.074***<br>(0.026)  | 0.068**<br>(0.028)   | 0.056*<br>(0.032)    | 0.086***<br>(0.032)  | 0.089***<br>(0.032)  | 0.136***<br>(0.034)  |
| <i>avg(g)</i>            | 0.023***<br>(0.005)  | 0.023***<br>(0.005)  | 0.036***<br>(0.004)  | 0.037***<br>(0.004)  | 0.037***<br>(0.004)  | 0.038***<br>(0.004)  | 0.044***<br>(0.007)  | 0.042***<br>(0.008)  | 0.033***<br>(0.009)  | 0.034***<br>(0.010)  | 0.031***<br>(0.009)  | 0.046***<br>(0.009)  |
| <i>avg(g) * min(ToM)</i> | -0.004***<br>(0.001) | -0.004***<br>(0.001) | -0.005***<br>(0.001) | -0.005***<br>(0.000) | -0.005***<br>(0.001) | -0.005***<br>(0.001) | -0.004***<br>(0.001) | -0.004***<br>(0.001) | -0.003**<br>(0.001)  | -0.004***<br>(0.001) | -0.004***<br>(0.001) | -0.007***<br>(0.002) |
| Chat Volume              |                      | -0.000<br>(0.001)    | 0.004***<br>(0.001)  | 0.003***<br>(0.001)  | 0.003***<br>(0.001)  | 0.004***<br>(0.001)  |                      | -0.003<br>(0.006)    | -0.003<br>(0.006)    | 0.001<br>(0.005)     | 0.000<br>(0.005)     | 0.002<br>(0.004)     |
| Trust                    |                      |                      | -0.015***<br>(0.002) | -0.014***<br>(0.002) | -0.014***<br>(0.002) | -0.014***<br>(0.002) |                      | 0.012**<br>(0.005)   | 0.015***<br>(0.005)  | 0.012**<br>(0.005)   | 0.012**<br>(0.006)   | 0.020***<br>(0.007)  |
| Religious Diversity      |                      |                      |                      | 0.015*<br>(0.009)    | 0.012<br>(0.011)     | 0.028**<br>(0.013)   |                      |                      |                      | -0.120***<br>(0.040) | -0.063<br>(0.050)    | -0.059<br>(0.043)    |
| Ethnic Diversity         |                      |                      |                      |                      | 0.005<br>(0.012)     | -0.005<br>(0.014)    |                      |                      |                      |                      | -0.095***<br>(0.031) | -0.120***<br>(0.034) |
| Gender                   |                      |                      |                      |                      |                      | -0.047**<br>(0.023)  |                      |                      |                      |                      |                      | 0.273***<br>(0.098)  |
| Constant                 | -0.238**<br>(0.109)  | -0.238**<br>(0.109)  | -0.546***<br>(0.090) | -0.575***<br>(0.086) | -0.579***<br>(0.089) | -0.593***<br>(0.094) | -0.884***<br>(0.156) | -0.832***<br>(0.181) | -0.643***<br>(0.198) | -0.588***<br>(0.218) | -0.519**<br>(0.203)  | -0.971***<br>(0.210) |
| N                        | 27                   | 27                   | 27                   | 27                   | 27                   | 27                   | 25                   | 25                   | 25                   | 25                   | 25                   | 25                   |
| AIC                      | -508.815             | -506.829             | -544.754             | -546.404             | -544.602             | -548.054             | -159.525             | -157.666             | -158.390             | -171.440             | -177.346             | -195.748             |
| R <sup>2</sup>           | 0.439                | 0.440                | 0.562                | 0.572                | 0.572                | 0.586                | 0.122                | 0.123                | 0.139                | 0.221                | 0.261                | 0.355                |

Note: Standardized coefficients reported. Robust standard errors reported in parenthesis \* = significant at the 90% level, \*\* = significant at the 95% level, and \*\*\* = significant at the 99% level.  $\Delta T$  represents the change in tokens collected between rounds 1-3 and rounds 4-6 (i.e. before and after the ecological change). HLr1 to HLr6 represent 6 regression equations estimated hierarchically, adding one new predictor for each equation, for the condition in which participants go from high to low resource growth rates. LH r1 to LHr6 represent the condition in which participants go from low to high resource growth rates.

207 Figure 7 represent marginal effects of *ToM* and *g* on *Time* and  $\Delta T$  for models HLt1 and  
 208 LHt1 in Table 2 and models HLr1 and LHr1 in Table 3 for selected values of *g* and *ToM*.

209 When environmental condition worsen (HL models) groups with high levels of both  $ToM$  and  
 210  $g$  perform better than groups with either high  $ToM$  or high  $g$  (as represented by  $ToM =$   
 211  $11$  and  $g = 31$ ). The main difference between HL and LH models is clearly shown in Figure 7  
 212 by the difference between the reduction in  $Time$  that is independent of the level of  $ToM$  in LH  
 213 models (panel Time LH), and seem to have a ceiling effect on  $g$ .  $Time$  and  $\Delta T$  as stated in  
 214 Supplementary Note 2 are not related in LH models, that is, more pressure on resources does not  
 215 provoke an increase in speed of resource depletion. Finally, it is important to note that Figure 7  
 216 represent the same results portrayed in Figures 2 and 3 in the main text. The difference being  
 217 that in the main text both  $ToM$  and  $g$  are the axis while the average  $Time$  or  $\Delta T$  is represented  
 218 by the color.

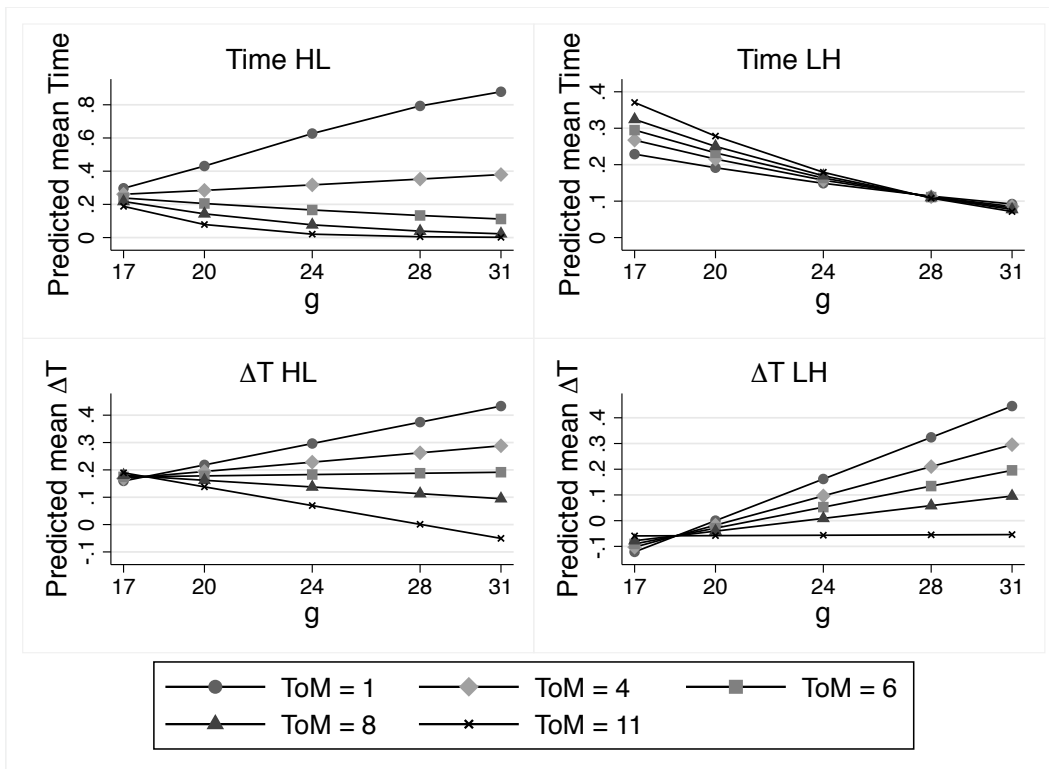

Figure 7: Marginal effects for HLt1, LHt1 models in Table 2 and HLr1 and LHR1 models in Table 3



## 219 **5 Supplementary Method 3**

### 220 **5.1 Three way interaction effect regressions**

221 Table 4 portrays the results of regressions that include three way interactions between cognitive  
222 abilities and ecological changes on *Time*. Here we first analyze the effect of  $g$ ,  $ToM$  and  
223  $change$  on *Time* without interaction (models HLt1 and LHt1, Table 4).  $change$  is a dummy  
224 variable that assumes value 0 in the first three rounds pre growth rate change, and value 1 in the  
225 second three rounds post growth rate change. We then analyze the interaction between  $g$  and  
226  $ToM$  for the first three rounds (model HLtB and HLtA, Table 4) and for the second three rounds  
227 (models HLtA and LHtA, Table 4). Finally we analyze the three way interaction between  $g$ ,  
228  $ToM$  and  $change$  (models HLt4 and LHt4, Table 4). It is important to remember here, that  
229 the lower *Time* is, the longer groups are able to harvest. Hence high values of *Time* represent  
230 faster resource collapse.

231 In Table 4, both  $ToM$  and  $g$  have a negative and independent effect in the HL treatment.  
232 However, when we add an interaction term for  $g$  and  $ToM$ , the interaction is significant and  
233 negative, while  $g$  and  $ToM$  have a positive effect on *Time*; that is, on their own,  $g$  and  $ToM$   
234 contribute to a faster resource collapse, but together they slow the resource collapse, or avoid  
235 it ( $Time = 0$ ). This result is consistent with Figure 2 in the main text. In LH models, the  
236 interaction term is negative and significant only in the last 3 rounds; after the change in re-  
237 growth rate (model LHr A, Table 4). Overall, when conditions improve (see LH models Table 4)  
238 reinforces the results presented in Table 2: cognitive abilities are less likely to have a significant  
239 effect on group ability to manage resources sustainably. Generally speaking, groups are more  
240 likely to perform worse after  $change$  in HL models ( $change > 0$  in model HLr4, Table 4).

241 The results portrayed in Table 4 are also illustrated in Figure 8. Figure 8 showcases the  
242 marginal effects of  $g$  and  $ToM$  before and after ecological changes. HLt1-b and LHt1-b repre-

243 sent the marginal effects of cognitive abilities when  $change = 0$  (rounds 1-3) for models HLt1  
244 and LHt1 in Table 4, and HLt1-a as well as LHt1-a represent the marginal effects of cognitive  
245 abilities when  $change = 1$  (rounds 4-6) for the same models (HLt1 andf LHt1 in Table 4).  
246 Panel HLt B and LHtB represent marginal effects of  $g$  and  $ToM$  for rounds 1-3 (before change)  
247 and reported in model HLt B and LHt B in Table 4. Finally, panels HLt4-b and LHt4-b repre-  
248 sent the marginal effects of cognitive abilities when  $change = 0$  (rounds 1-3) for models HLt4  
249 and LHt4 in Table 4, and HLt4-a as well as LHt4-a represent the marginal effects of cognitive  
250 abilities when  $change = 1$  (rounds 4-6) for the same models (HLt4 andf LHt4 in Table 4).

251 Here we can see how groups are able to manage resources sustainably (or not) ( $Time$ ) for  
252 different levels of  $g$  and  $ToM$ . Similar to the results portrayed in Figure 2 in the main paper and  
253 Table 2 above, groups with high  $g$  but low  $ToM$  (Figure 8 lower right corner of plots) or high  
254  $ToM$  but low  $g$  (Figure 8 upper left corner of plots) perform worse than groups with high  $g$  and  
255 high  $ToM$  (Figure 8 upper right corner of plots). When  $g$  increases, at low levels of  $ToM$ , a  
256 group is more likely to collapse the resource (i.e.,  $Time$  is higher). Generally speaking, before  
257 and after the change, in both HL and LH models, groups with high  $g$  and high  $ToM$  are more  
258 able to manage resources sustainably (dark blue area in the upper right corner).

|                                    | HLt1                 | HLtB                 | HLtA               | HLt4                 | LHt1                 | LHtB                 | LHtA                | LHt4                 |
|------------------------------------|----------------------|----------------------|--------------------|----------------------|----------------------|----------------------|---------------------|----------------------|
| <i>min(ToM)</i>                    | -0.301***<br>(0.062) | 1.361*<br>(0.720)    | 0.246<br>(0.498)   | 1.361*<br>(0.718)    | 0.046<br>(0.063)     | -0.216<br>(0.683)    | 1.958**<br>(0.995)  | -0.216<br>(0.680)    |
| <i>avg(g)</i>                      | -0.101*<br>(0.052)   | 0.459**<br>(0.208)   | -0.004<br>(0.152)  | 0.459**<br>(0.207)   | -0.134**<br>(0.061)  | -0.175<br>(0.228)    | 0.332<br>(0.251)    | -0.175<br>(0.228)    |
| <i>change</i>                      | -2.276***<br>(0.453) |                      |                    |                      | -2.414***<br>(0.496) |                      |                     |                      |
| Round 1                            | 0.000<br>(.)         | 0.000<br>(.)         |                    | 0.000<br>(.)         | 0.000<br>(.)         | 0.000<br>(.)         |                     | 0.000<br>(.)         |
| Round 2                            | -1.369***<br>(0.440) | -1.499***<br>(0.464) |                    | -1.499***<br>(0.462) | -1.518***<br>(0.460) | -1.506***<br>(0.449) |                     | -1.506***<br>(0.447) |
| Round 3                            | -1.706***<br>(0.453) | -1.849***<br>(0.495) |                    | -1.849***<br>(0.493) | -1.229***<br>(0.413) | -1.219***<br>(0.409) |                     | -1.219***<br>(0.408) |
| Round 4                            | 0.729<br>(0.457)     |                      | 0.000<br>(.)       | 0.690*<br>(0.374)    | 0.452<br>(0.559)     |                      | 0.000<br>(.)        | 0.480<br>(0.516)     |
| Round 5                            | 0.391<br>(0.365)     |                      | -0.319<br>(0.374)  | 0.372<br>(0.318)     | 0.122<br>(0.566)     |                      | -0.351<br>(0.487)   | 0.129<br>(0.503)     |
| Round 6                            | 0.000<br>(.)         |                      | -0.690*<br>(0.375) | 0.000<br>(.)         | 0.000<br>(.)         |                      | -0.480<br>(0.518)   | 0.000<br>(.)         |
| <i>min(ToM) * avg(g)</i>           |                      | -0.085***<br>(0.032) | -0.018<br>(0.022)  | -0.085***<br>(0.032) |                      | 0.015<br>(0.032)     | -0.099**<br>(0.047) | 0.015<br>(0.031)     |
| <i>Bchange</i>                     |                      |                      |                    | 0.000<br>(.)         |                      |                      |                     | 0.000<br>(.)         |
| <i>Achange</i>                     |                      |                      |                    | 5.666<br>(5.675)     |                      |                      |                     | -11.658<br>(7.278)   |
| <i>Bchange * min(ToM)</i>          |                      |                      |                    | 0.000<br>(.)         |                      |                      |                     | 0.000<br>(.)         |
| <i>Achange * min(ToM)</i>          |                      |                      |                    | -1.114<br>(0.873)    |                      |                      |                     | 2.174*<br>(1.202)    |
| <i>Bchange * avg(g)</i>            |                      |                      |                    | 0.000<br>(.)         |                      |                      |                     | 0.000<br>(.)         |
| <i>Achange * avg(g)</i>            |                      |                      |                    | -0.463*<br>(0.257)   |                      |                      |                     | 0.507<br>(0.338)     |
| <i>Bchange * min(ToM) * avg(g)</i> |                      |                      |                    | 0.000<br>(.)         |                      |                      |                     | 0.000<br>(.)         |
| <i>Achange * min(ToM) * avg(g)</i> |                      |                      |                    | 0.067*<br>(0.039)    |                      |                      |                     | -0.114**<br>(0.056)  |
| Constant                           | 3.702***<br>(1.140)  | -7.112<br>(4.663)    | -0.756<br>(3.309)  | -7.112<br>(4.649)    | 2.627**<br>(1.325)   | 3.093<br>(4.931)     | -8.084<br>(5.461)   | 3.093<br>(4.915)     |
| N                                  | 162.000              | 81.000               | 81.000             | 162.000              | 150.000              | 75.000               | 75.000              | 150.000              |
| AIC                                | 103.783              | 60.475               | 48.042             | 108.517              | 125.762              | 81.563               | 48.384              | 129.947              |
| D                                  | 0.224                | 0.297                | 0.118              | 0.208                | 0.383                | 0.525                | 0.208               | 0.366                |

Note: Robust standard errors reported in parenthesis \* = significant at the 90% level, \*\* = significant at the 95% level, and \*\*\* = significant at the 99% level. Round 1 = baseline to which other rounds are compared to. *change* = dummy variable representing before *Bchange* and after *Achange* the ecological change. *Bchange* is used as baseline. HL represent 4 regression equations estimated assessing the relationship between perturbation, *g* and *ToM* and their effect on *Time* in case of pejorative conditions (high to low resource growth rate). LH represent the condition in which participants go from low to high resource growth rates. HL or LH B = takes into only account rounds before the shock (round 1 used as baseline). HL or LH A = takes into account only rounds after the change (round 4 used as baseline)

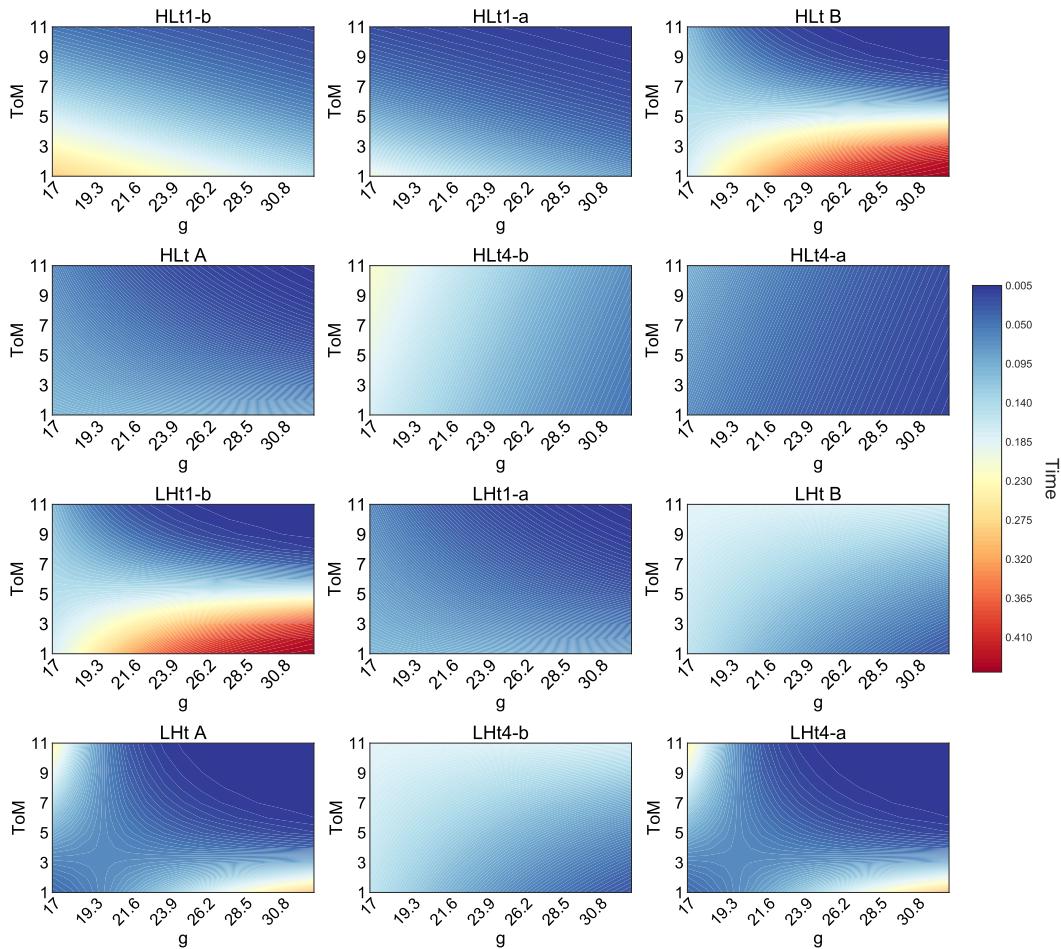

Figure 8: Effects of  $g$  and  $ToM$  and  $change\ Time$ . Blue color = group harvested for more time (i.e. did not or collapsed the resource later). HL = high-to-low resource growth treatment, LH = low-to-high resource growth treatment. -b = marginal effect when  $change = 0$  (before change); -a = marginal effects when  $change = 1$  (after change). B = marginal effects taking only into account rounds 1-3 (before change). A = marginal effects calculated taking only into account rounds 4-6 (after change). *The different sub-figures represent the marginal effects of  $g$  and  $ToM$  for the different models portrayed in SI Table 4*

259 In Table 5 we investigate the effects of  $g$ ,  $ToM$  and ecological *change* on  $avgT$ . In order  
260 to run a three way interaction including tokens collected before and after the resource change,  
261 we are unable to employ  $\Delta T$  as it is calculated as the difference between round 1-3 and 4-6.  
262 A three way interaction variable is impossible for this response variable. However, we can  
263 assess the effect of cognitive abilities on the average tokens collected as a % of the theoretically  
264 maximum number of tokens that could have been collected per round as the dependent variable  
265 ( $avgT$ ). This allows us to assess how cognitive abilities affect overall  $avgT$  before and after the  
266 ecological change.

267 To further investigate the effects of  $g$ ,  $ToM$  and their interaction on group ability to manage  
268 and harvest resources, we then analyze the interaction between  $g$  and  $ToM$  for the first three  
269 rounds (model HLtB and HLtA) and for the second three rounds (models HLtA and LHtA).  
270 Finally we analyze the three way interaction between  $g$ ,  $ToM$  and *change* (models HLt4 and  
271 LHt4).

272 In this last analysis, based on the results reported in Table 5, there is, again, a clear difference  
273 between improving and worsening conditions (HL and LH models). In HL models (worsening  
274 conditions) an increase in  $g$  increases  $avgT$  when not interacted and when only taking into  
275 account rounds 4-6 (after change), see models HLr1 and HLrA in Table 5. However, an increase  
276 in  $g$  reduces  $avgT$  when interacted with both,  $ToM$  and *change* and when taking into account  
277 only rounds 1-3 (before change), see models HLrB and HLr4 in Table 5. On the other hand, in  
278 LH models, an increase in  $g$  always increases  $avgT$ : see models Lhr1 LhrB LhrA and Lhr4 in  
279 Table 5. In HL models an increase in  $ToM$  increases token harvested only when not interacted,  
280 see model HLr1, Table 5. In all other models an increase in  $ToM$  reduces  $avgT$ : see models  
281 HLrB, HLrA, HLr4, Table 5. In LH models, an increase in  $ToM$  reduces  $avgT$  when not  
282 interacted, see model Lhr1, Table 5; however an increase in  $ToM$  increases  $avgT$  in all other  
283 LH models: see LhrB, LhrA, Lhr4 in Table 5.

284 In HL models  $g$  is significant only when not interacted (model HLr1, Table 5). However,  
285 in LH models  $g$  is always significant. On the other hand, in HL models,  $ToM$  is significant  
286 when not interacted (model HLr1, Table 5), before the change (model HLrB, Table 5) and when  
287 interacted with both,  $g$  and  $change$  (model HLr4, Table 5). In LH models,  $ToM$  is significant  
288 only in rounds 4-6 (after the change, model LHrA, Table 5).

289 The interaction term  $g * ToM$  is positively associated with  $avgT$ : an increase in  $g * ToM$   
290 increases  $avgT$  in all HL models (see models HLrB, HLrA and HLr4, Table 5), albeit being  
291 significant only when rounds 1-3 are taken into account, or when also interacted with  $change$   
292 (models HLrB and HLr4, Table 5). On the other hand, in LH models the interaction term is  
293 negatively related with  $avgT$ : an increase in  $g * ToM$  reduces  $avgT$ : see models LHrB, LHrA  
294 and LHr4, Table 5. Further,  $g * ToM$  is significant only after the change (model LHrA, Table  
295 5).

296 These results are also shown graphically in Figure 9. In Figure 9, panels HLr1-b and LHr1-b  
297 represent the marginal effects of cognitive abilities when  $change = 0$  (rounds 1-3) for models  
298 HLr1 and LHr1 in Table 5, and HLr1-a as well as LHr1-a represent the marginal effects of  
299 cognitive abilities when  $change = 1$  (rounds 4-6) for the same models (HLr1 and LHr1 in  
300 Table 5). Panel HLrB and LHrB represent marginal effects of  $g$  and  $ToM$  for rounds 1-3  
301 (before change) and reported in model HLrB and LHrB in Table 5. Panels HLrA and LHrA  
302 represent marginal effects of  $g$  and  $ToM$  for rounds 4-6 (after change) and reported models  
303 HLrA and LHrA in Table 5. Finally, panels HLr4-b and LHr4-b represent the marginal effects  
304 of cognitive abilities when  $change = 0$  (rounds 1-3) for models HLr4 and LHr4 in Table 5, and  
305 HLr4-a as well as LHr4-a represent the marginal effects of cognitive abilities when  $change = 1$   
306 (rounds 4-6) for the same models (HLr4 and LHr4 in Table 5). Figure 9, once again, reiterates  
307 the importance of both high  $g$  and  $ToM$ .

308 Fig.9 portrays the importance of both, high  $g$  and high  $ToM$ . In fact the figure portrays

309 how groups with higher competency in both cognitive abilities are able to harvest closer to the  
310 optimal level (interacted or not), as indicated by the dark blue color on the top right corner of  
311 panels HLrB, HLrA and HLr4 of Fig.9. Further, while HLr1-b, HLrB and HLr4-b all indicate  
312 marginal effects of  $g$  and  $ToM$  before theological change, Fig.9 panels HLr1-a, HLrA and HLr4-  
313 a indicate the marginal effects of  $g$  and  $ToM$  after the ecological change. In HLr1-b and HLr1-a  
314 there is no interaction effect between  $g$  and  $ToM$  (see also Table 4) but marginal effects are  
315 calculated respectively before and after the change. In panel HLrA and HLrB the regression  
316 includes the interaction effect between  $g$  and  $ToM$  but the model is run only for rounds 1-3  
317 (model HLrB, Fig.9) or rounds 4-6 (model HLrA, Fig.9). Finally, panel HLr4 showcases the  
318 three way interaction effect between  $g$ ,  $ToM$  and ecological *change* as analyzed in model HLr4,  
319 Table 4. Panels HLr4-b and HLr4-a indicate marginal effects of  $g$  and  $ToM$  before and after  
320 the ecological change respectively. In all three panels, when both  $g$  and  $ToM$  are high, groups  
321 harvest a greater percentage of potential tokens because they do not collapse the resource base  
322 as readily as groups only high in  $g$  or  $ToM$ . In contrast, prior to the resource change in the LH  
323 treatment, groups with high  $g$  do better than groups with high  $g$  and high  $ToM$  or just as well.  
324 In other words, when conditions improve, groups with high  $g$  are better able to take advantage  
325 of the improved conditions and hence are able closer to the optimal level (the dark blue is in the  
326 lower right-hand corner of all effect plots labeled LH in Fig.9).

327 In sum, it is clearly noticeable that in the case of a negative change (HL treatment),  $avgT$  is  
328 higher when both  $g$  and  $ToM$  are high. However, in the case of improving conditions,  $g$  is the  
329 cognitive ability that more clearly increases overall  $avgT$  (see also main text).

|                                  | HLr1                | HLrB                | HLrA             | HLr4                | LHr1                | LHrB              | LHrA                 | LHr4                 |
|----------------------------------|---------------------|---------------------|------------------|---------------------|---------------------|-------------------|----------------------|----------------------|
| $min(ToM)$                       | 0.012***<br>(0.002) | -0.064**<br>(0.025) | 0.001<br>(0.027) | -0.064**<br>(0.025) | -0.002<br>(0.004)   | 0.028<br>(0.029)  | 0.103**<br>(0.045)   | 0.028<br>(0.029)     |
| $avg(g)$                         | 0.016***<br>(0.002) | -0.009<br>(0.008)   | 0.014<br>(0.010) | -0.009<br>(0.008)   | 0.016***<br>(0.003) | 0.015*<br>(0.008) | 0.060***<br>(0.010)  | 0.015*<br>(0.008)    |
| $change$                         | 0.152***<br>(0.011) |                     |                  |                     | -0.005<br>(0.020)   |                   |                      |                      |
| $min(ToM) * avg(g)$              |                     | 0.004***<br>(0.001) | 0.000<br>(0.001) | 0.004***<br>(0.001) |                     | -0.001<br>(0.001) | -0.005**<br>(0.002)  | -0.001<br>(0.001)    |
| $B_{change}$                     |                     |                     |                  | 0.000<br>(.)        |                     |                   |                      | 0.000<br>(.)         |
| $A_{change}$                     |                     |                     |                  | -0.238<br>(0.277)   |                     |                   |                      | -0.884***<br>(0.287) |
| $B_{change} * min(ToM)$          |                     |                     |                  | 0.000<br>(.)        |                     |                   |                      | 0.000<br>(.)         |
| $A_{change} * min(ToM)$          |                     |                     |                  | 0.065*<br>(0.036)   |                     |                   |                      | 0.074<br>(0.053)     |
| $B_{change} * avg(g)$            |                     |                     |                  | 0.000<br>(.)        |                     |                   |                      | 0.000<br>(.)         |
| $A_{change} * avg(g)$            |                     |                     |                  | 0.023*<br>(0.013)   |                     |                   |                      | 0.044***<br>(0.013)  |
| $B_{change} * min(ToM) * avg(g)$ |                     |                     |                  | 0.000<br>(.)        |                     |                   |                      | 0.000<br>(.)         |
| $A_{change} * min(ToM) * avg(g)$ |                     |                     |                  | -0.004**<br>(0.002) |                     |                   |                      | -0.004*<br>(0.002)   |
| Constant                         | 0.049<br>(0.039)    | 0.545***<br>(0.175) | 0.307<br>(0.214) | 0.545***<br>(0.175) | 0.260***<br>(0.070) | 0.227<br>(0.166)  | -0.657***<br>(0.234) | 0.227<br>(0.166)     |
| N                                | 162.000             | 81.000              | 81.000           | 162.000             | 150.000             | 75.000            | 75.000               | 150.000              |
| AIC                              | -408.450            | -209.946            | -213.722         | -423.624            | -203.736            | -113.716          | -93.575              | -205.943             |
| $R^2$                            | 0.698               | 0.658               | 0.420            | 0.738               | 0.099               | 0.044             | 0.227                | 0.158                |

Note: Robust standard errors reported in parenthesis \* = significant at the 90% level, \*\* = significant at the 95% level, and \*\*\* = significant at the 99% level.  $\Delta T$  represents the change in tokens collected between the rounds 1-3 and the rounds 4-6.  $change$  = dummy variable representing before  $B_{change}$  and after  $A_{change}$  the ecological change. HL represents 4 regression equations estimated assessing the relationship between perturbation,  $g$  and  $ToM$  and their effect on  $\Delta T$  in case of pejorative conditions (high to low resource growth rate). LH represent the condition in which participants go from low to high resource growth rates. B = takes into only account rounds before the shock (round 1 used as baseline). A = takes into account only rounds after the change (round 4 used as baseline)



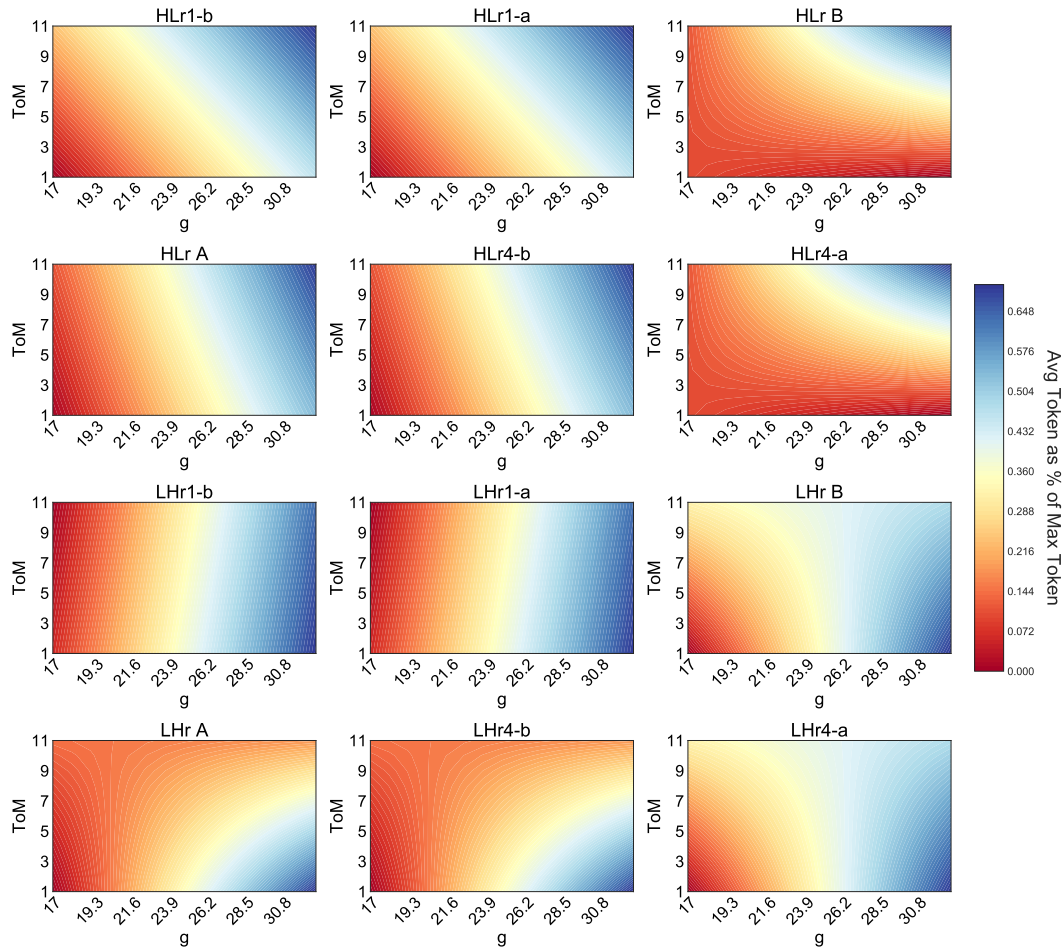

Figure 9: Effects of  $g$  and  $ToM$  and *change* average token collected as % of maximum token available. Blue color = group harvested less. HL = high-to-low resource growth treatment, LH = low-to-high resource growth treatment. -b = marginal effect when *change* = 0 (before change); -a = marginal effects when *change* = 1 (after change). B = marginal effects taking only into account rounds 1-3 (before change). A = marginal effects calculated taking only into account rounds 4-6 (after change). *The different sub-figures represent the marginal effects of  $g$  and  $ToM$  for the different models portrayed in SI Table 5.*

## 330 6 Supplementary Method 4

### 331 6.1 Additional Models, changing aggregation of $g$ and $ToM$

332 Although we assess  $avg\ g$  and  $min\ ToM$  as the main indicators of group cognitive abilities, in  
 333 the following table we assess the same statistical models presented in Tables 2 and 3 using either  
 334  $min(g)$  or  $avg(ToM)$  on both  $Time$  and  $\Delta T$ . The results are consistent with those presented  
 335 in the main paper.

Table 6: OLS Regression: Individual cognitive abilities and controlling factor on  $\Delta T$  using  $avg(ToM)$  in groups

| Dep. Var.           | HLSr1    | HLSr2    | HLSr3     | HLSr4     | HLSr5     | HLSr6     | LHsr1     | LHsr2    | LHsr3    | LHsr4     | LHsr5     | LHsr6     |
|---------------------|----------|----------|-----------|-----------|-----------|-----------|-----------|----------|----------|-----------|-----------|-----------|
| $avg(ToM)$          | 0.071*   | 0.076**  | 0.132***  | 0.146***  | 0.155***  | 0.145***  | 0.075*    | 0.067    | 0.050    | 0.039     | 0.044     | 0.097**   |
|                     | (0.036)  | (0.038)  | (0.036)   | (0.035)   | (0.037)   | (0.038)   | (0.045)   | (0.045)  | (0.047)  | (0.052)   | (0.052)   | (0.048)   |
| $avg(g)$            | 0.028*   | 0.027*   | 0.058***  | 0.065***  | 0.068***  | 0.063***  | 0.053***  | 0.048*** | 0.033*   | 0.016     | 0.016     | 0.040**   |
|                     | (0.015)  | (0.015)  | (0.014)   | (0.014)   | (0.016)   | (0.016)   | (0.017)   | (0.017)  | (0.019)  | (0.022)   | (0.022)   | (0.019)   |
| $avg(g) * avg(ToM)$ | -0.004** | -0.004** | -0.006*** | -0.007*** | -0.007*** | -0.007*** | -0.004**  | -0.004*  | -0.003   | -0.001    | -0.002    | -0.005**  |
|                     | (0.002)  | (0.002)  | (0.001)   | (0.001)   | (0.002)   | (0.002)   | (0.002)   | (0.002)  | (0.002)  | (0.002)   | (0.002)   | (0.002)   |
| $\Delta Chat$       |          | 0.004**  | 0.006***  | 0.006***  | 0.006***  | 0.007***  |           | -0.006   | -0.007   | -0.007    | -0.007    | -0.005    |
|                     |          | (0.002)  | (0.001)   | (0.001)   | (0.002)   | (0.002)   |           | (0.006)  | (0.006)  | (0.005)   | (0.005)   | (0.005)   |
| Trust               |          |          | -0.016*** | -0.016*** | -0.017*** | -0.017*** |           |          | 0.013**  | 0.019***  | 0.015**   | 0.022***  |
|                     |          |          | (0.002)   | (0.002)   | (0.003)   | (0.003)   |           |          | (0.005)  | (0.006)   | (0.007)   | (0.008)   |
| Religious Diversity |          |          |           | 0.016**   | 0.027*    | 0.037**   |           |          |          | -0.122*** | -0.070    | -0.058    |
|                     |          |          |           | (0.008)   | (0.014)   | (0.016)   |           |          |          | (0.041)   | (0.053)   | (0.045)   |
| Ethnic Diversity    |          |          |           |           | -0.018    | -0.025    |           |          |          |           | -0.085*** | -0.109*** |
|                     |          |          |           |           | (0.016)   | (0.016)   |           |          |          |           | (0.032)   | (0.034)   |
| Gender              |          |          |           |           |           | -0.032    |           |          |          |           |           | 0.245**   |
|                     |          |          |           |           |           | (0.026)   |           |          |          |           |           | (0.098)   |
| Constant            | -0.389   | -0.427   | -1.089*** | -1.250*** | -1.338*** | -1.225*** | -1.021*** | -0.939** | -0.668   | -0.289    | -0.260    | -0.862**  |
|                     | (0.353)  | (0.368)  | (0.339)   | (0.334)   | (0.359)   | (0.369)   | (0.362)   | (0.365)  | (0.410)  | (0.460)   | (0.468)   | (0.407)   |
| N                   | 27       | 27       | 27        | 27        | 27        | 27        | 25        | 25       | 25       | 25        | 25        | 25        |
| AIC                 | -447.568 | -449.216 | -481.275  | -481.767  | -481.228  | -480.904  | -155.479  | -154.100 | -155.229 | -168.495  | -172.727  | -186.409  |
| $R^2$               | 0.182    | 0.200    | 0.352     | 0.362     | 0.367     | 0.374     | 0.098     | 0.102    | 0.120    | 0.205     | 0.238     | 0.313     |

Note: Standardized coefficients reported. Robust standard errors reported in parenthesis \* = significant at the 90% level, \*\* = significant at the 95% level, and \*\*\* = significant at the 99% level.  $\Delta T$  represents the change in tokens collected between rounds 1-3 and rounds 4-6 (i.e. before and after the ecological change). HLSr1 to HLSr6 represent 6 regression equations estimated hierarchically, adding one new predictor for each equation, for the condition in which participants go from high to low resource growth rates. LH r1 to LHr6 represent the condition in which participants go from low to high resource growth rates.

| Dep.Var             | HLst1                | HLst2                | HLst3                | HLst4                | HLst5                | HLst6                | LHst1                | LHst2                | LHst3                | LHst4                | LHst5                | LHst6                |
|---------------------|----------------------|----------------------|----------------------|----------------------|----------------------|----------------------|----------------------|----------------------|----------------------|----------------------|----------------------|----------------------|
| $avg(ToM)$          | 0.081<br>(0.984)     | 0.091<br>(1.015)     | 0.231<br>(1.007)     | -0.221<br>(1.067)    | -1.084<br>(1.051)    | -1.115<br>(1.205)    | 1.068<br>(0.922)     | 1.066<br>(0.900)     | 1.000<br>(0.942)     | 1.039<br>(0.930)     | 1.003<br>(0.967)     | 1.073<br>(0.984)     |
| $avg(g)$            | 0.114<br>(0.396)     | 0.118<br>(0.406)     | 0.212<br>(0.410)     | 0.030<br>(0.435)     | -0.297<br>(0.435)    | -0.312<br>(0.508)    | 0.197<br>(0.369)     | 0.196<br>(0.360)     | 0.150<br>(0.388)     | 0.192<br>(0.381)     | 0.176<br>(0.394)     | 0.205<br>(0.402)     |
| $avg(g) * avg(ToM)$ | -0.025<br>(0.042)    | -0.026<br>(0.044)    | -0.033<br>(0.043)    | -0.016<br>(0.046)    | 0.020<br>(0.045)     | 0.022<br>(0.053)     | -0.036<br>(0.042)    | -0.036<br>(0.040)    | -0.032<br>(0.042)    | -0.035<br>(0.042)    | -0.031<br>(0.043)    | -0.035<br>(0.044)    |
| Round 1 Baseline    | 0.000<br>(.)         | 0.000<br>(.)         | 0.000<br>(.)         | 0.000<br>(.)         | 0.000<br>(.)         | 0.000<br>(.)         | 0.000<br>(.)         | 0.000<br>(.)         | 0.000<br>(.)         | 0.000<br>(.)         | 0.000<br>(.)         | 0.000<br>(.)         |
| Round 2             | -1.324***<br>(0.466) | -1.330***<br>(0.469) | -1.340***<br>(0.469) | -1.339***<br>(0.472) | -1.381***<br>(0.442) | -1.379***<br>(0.444) | -1.564***<br>(0.458) | -1.389***<br>(0.483) | -1.396***<br>(0.486) | -1.365***<br>(0.486) | -1.363***<br>(0.482) | -1.384***<br>(0.486) |
| Round 3             | -1.647***<br>(0.493) | -1.654***<br>(0.532) | -1.666***<br>(0.532) | -1.664***<br>(0.526) | -1.714***<br>(0.471) | -1.713***<br>(0.471) | -1.268***<br>(0.410) | -1.112**<br>(0.433)  | -1.116***<br>(0.431) | -1.089**<br>(0.436)  | -1.091**<br>(0.447)  | -1.110**<br>(0.457)  |
| Round 4             | -1.494***<br>(0.427) | -1.502***<br>(0.434) | -1.515***<br>(0.444) | -1.511***<br>(0.448) | -1.556***<br>(0.413) | -1.554***<br>(0.410) | -2.019***<br>(0.432) | -1.915***<br>(0.445) | -1.918***<br>(0.446) | -1.900***<br>(0.448) | -1.909***<br>(0.440) | -1.922***<br>(0.446) |
| Round 5             | -1.818***<br>(0.401) | -1.826***<br>(0.420) | -1.837***<br>(0.422) | -1.836***<br>(0.424) | -1.892***<br>(0.385) | -1.890***<br>(0.384) | -2.355***<br>(0.444) | -2.248***<br>(0.460) | -2.254***<br>(0.459) | -2.236***<br>(0.465) | -2.237***<br>(0.466) | -2.252***<br>(0.471) |
| Round 6             | -2.195***<br>(0.392) | -2.202***<br>(0.418) | -2.213***<br>(0.424) | -2.212***<br>(0.430) | -2.278***<br>(0.428) | -2.277***<br>(0.428) | -2.479***<br>(0.464) | -2.411***<br>(0.465) | -2.415***<br>(0.467) | -2.404***<br>(0.471) | -2.407***<br>(0.476) | -2.417***<br>(0.482) |
| Chat                |                      | 0.002<br>(0.043)     | 0.004<br>(0.044)     | 0.002<br>(0.047)     | 0.000<br>(0.044)     | -0.000<br>(0.043)    |                      | -0.042<br>(0.039)    | -0.041<br>(0.039)    | -0.049<br>(0.041)    | -0.051<br>(0.040)    | -0.046<br>(0.046)    |
| Trust               |                      |                      | -0.060<br>(0.083)    | -0.052<br>(0.080)    | 0.067<br>(0.097)     | 0.069<br>(0.095)     |                      | 0.039<br>(0.092)     | 0.032<br>(0.090)     | 0.063<br>(0.094)     | 0.071<br>(0.094)     | 0.071<br>(0.100)     |
| Religious Diversity |                      |                      |                      | -0.507<br>(0.348)    | -1.545***<br>(0.446) | -1.531***<br>(0.533) |                      |                      | 0.268<br>(0.371)     | -0.062<br>(0.451)    | -0.066<br>(0.488)    | -0.066<br>(0.493)    |
| Ethnic Diversity    |                      |                      |                      |                      | 1.553***<br>(0.483)  | 1.544***<br>(0.535)  |                      |                      |                      | 0.562<br>(0.451)     | 0.540<br>(0.448)     | 0.540<br>(0.448)     |
| Gender              |                      |                      |                      |                      |                      | -0.041<br>(0.824)    |                      |                      |                      |                      | 0.238<br>(0.912)     | 0.238<br>(0.912)     |
| Constant            | 1.472<br>(9.055)     | 1.368<br>(9.381)     | -0.530<br>(9.382)    | 4.489<br>(10.134)    | 12.378<br>(9.999)    | 12.709<br>(11.765)   | -6.896<br>(8.213)    | -6.710<br>(7.999)    | -5.771<br>(8.631)    | -6.662<br>(8.464)    | -6.722<br>(8.749)    | -7.465<br>(8.967)    |
| N                   | 162                  | 162                  | 162                  | 162                  | 162                  | 162                  | 150                  | 150                  | 150                  | 150                  | 150                  | 150                  |
| AIC                 | 108.753              | 110.752              | 112.602              | 114.050              | 112.794              | 114.793              | 124.691              | 126.241              | 128.168              | 129.998              | 131.383              | 133.354              |
| D                   | 0.244                | 0.246                | 0.247                | 0.245                | 0.224                | 0.226                | 0.364                | 0.363                | 0.365                | 0.367                | 0.365                | 0.367                |

Note: Robust standard errors reported in parenthesis \* = significant at the 90% level, \*\* = significant at the 95% level, and \*\*\* = significant at the 99% level. Round 1 = baseline to which other rounds are compared to. HLr1 to HLr6 represent 6 regression equations estimated hierarchically, adding one new predictor for each equation, for the condition in which participants go from high to low resource growth rates. LH r1 to LHr6 represent the condition in which participants go from low to high resource growth rates.

| Dep. Var.           | gHLsr1               | gHLsr2               | gHLsr3               | gHLsr4               | gHLsr5               | gHLsr6               | gLHsr1             | gLHsr2               | gLHsr3               | gLHsr4               | gLHsr5               | gLHsr6               |
|---------------------|----------------------|----------------------|----------------------|----------------------|----------------------|----------------------|--------------------|----------------------|----------------------|----------------------|----------------------|----------------------|
| $min(ToM)$          | 0.017*<br>(0.010)    | 0.018*<br>(0.010)    | 0.034***<br>(0.008)  | 0.033***<br>(0.008)  | 0.036***<br>(0.010)  | 0.037***<br>(0.010)  | 0.076<br>(0.063)   | 0.064<br>(0.061)     | 0.008<br>(0.051)     | 0.042<br>(0.052)     | 0.155**<br>(0.067)   | 0.160***<br>(0.057)  |
| $min(g)$            | 0.011***<br>(0.004)  | 0.012***<br>(0.004)  | 0.022***<br>(0.004)  | 0.023***<br>(0.004)  | 0.024***<br>(0.005)  | 0.024***<br>(0.005)  | 0.038**<br>(0.019) | 0.033*<br>(0.019)    | 0.001<br>(0.016)     | 0.005<br>(0.016)     | 0.044*<br>(0.022)    | 0.049**<br>(0.020)   |
| $min(g) * min(ToM)$ | -0.002***<br>(0.001) | -0.002***<br>(0.001) | -0.003***<br>(0.000) | -0.003***<br>(0.000) | -0.003***<br>(0.001) | -0.003***<br>(0.001) | -0.005<br>(0.004)  | -0.004<br>(0.004)    | -0.001<br>(0.003)    | -0.002<br>(0.003)    | -0.009**<br>(0.004)  | -0.010***<br>(0.003) |
| $\Delta Chat$       |                      | -0.001<br>(0.001)    | 0.002<br>(0.001)     | 0.001<br>(0.001)     | 0.001<br>(0.002)     | 0.002<br>(0.002)     |                    | -0.006<br>(0.005)    | -0.008<br>(0.006)    | -0.004<br>(0.004)    | -0.001<br>(0.004)    | -0.001<br>(0.004)    |
| Trust               |                      |                      | -0.014***<br>(0.002) | -0.013***<br>(0.002) | -0.012***<br>(0.003) | -0.012***<br>(0.003) |                    | 0.023***<br>(0.007)  | 0.025***<br>(0.008)  | 0.013<br>(0.008)     | 0.019**<br>(0.008)   | 0.019**<br>(0.008)   |
| Religious Diversity |                      |                      |                      | 0.015<br>(0.010)     | 0.005<br>(0.012)     | 0.018<br>(0.015)     |                    | -0.136***<br>(0.038) | -0.038<br>(0.041)    | -0.038<br>(0.041)    | -0.030<br>(0.037)    | -0.030<br>(0.037)    |
| Ethnic Diversity    |                      |                      |                      |                      | 0.016<br>(0.014)     | 0.008<br>(0.015)     |                    |                      | -0.164***<br>(0.034) | -0.179***<br>(0.034) | -0.179***<br>(0.036) | -0.179***<br>(0.036) |
| Gender              |                      |                      |                      |                      |                      | -0.035<br>(0.023)    |                    |                      |                      |                      | 0.219***<br>(0.079)  | 0.219***<br>(0.079)  |
| Constant            | 0.078<br>(0.071)     | 0.068<br>(0.071)     | -0.123*<br>(0.068)   | -0.139**<br>(0.069)  | -0.157**<br>(0.079)  | -0.158**<br>(0.079)  | -0.623*<br>(0.336) | -0.533<br>(0.326)    | 0.039<br>(0.285)     | 0.042<br>(0.282)     | -0.612<br>(0.390)    | -0.816**<br>(0.356)  |
| N                   | 27                   | 27                   | 27                   | 27                   | 27                   | 27                   | 25                 | 25                   | 25                   | 25                   | 25                   | 25                   |
| AIC                 | -489.138             | -487.702             | -515.572             | -516.370             | -515.663             | -516.260             | -148.815           | -147.624             | -153.182             | -171.815             | -189.111             | -201.712             |
| R <sup>2</sup>      | 0.367                | 0.369                | 0.475                | 0.484                | 0.489                | 0.497                | 0.057              | 0.062                | 0.108                | 0.223                | 0.317                | 0.380                |

Note: Standardized coefficients reported. Robust standard errors reported in parenthesis \* = significant at the 90% level, \*\* = significant at the 95% level, and \*\*\* = significant at the 99% level.  $\Delta T$  represents the change in tokens collected between rounds 1-3 and rounds 4-6 (i.e. before and after the ecological change). HLr1 to HLr6 represent 6 regression equations estimated hierarchically, adding one new predictor for each equation, for the condition in which participants go from high to low resource growth rates. LH r1 to LHr6 represent the condition in which participants go from low to high resource growth rates.

| Table 9: General Linear Model: Individual cognitive abilities and controlling factors on <i>Time</i> using <i>min(g)</i> in groups |                      |                      |                      |                      |                      |                      |                      |                      |                      |                      |                      |                      |
|------------------------------------------------------------------------------------------------------------------------------------|----------------------|----------------------|----------------------|----------------------|----------------------|----------------------|----------------------|----------------------|----------------------|----------------------|----------------------|----------------------|
| Dep.Var                                                                                                                            | gHLst1               | gHLst2               | gHLst3               | gHLst4               | gHLst5               | gHLst6               | gLHst1               | gLHst2               | gLHst3               | gLHst4               | gLHst5               | gLHst6               |
| <i>min(ToM)</i>                                                                                                                    | 0.288<br>(0.323)     | 0.288<br>(0.323)     | 0.181<br>(0.353)     | 0.290<br>(0.344)     | 0.622*<br>(0.320)    | 0.620*<br>(0.326)    | 0.946<br>(0.719)     | 0.906<br>(0.724)     | 1.187<br>(0.759)     | 1.069<br>(0.745)     | 0.915<br>(0.877)     | 0.928<br>(0.878)     |
| <i>min(g)</i>                                                                                                                      | 0.026<br>(0.129)     | 0.026<br>(0.129)     | -0.044<br>(0.146)    | -0.020<br>(0.142)    | 0.115<br>(0.137)     | 0.119<br>(0.140)     | 0.283<br>(0.249)     | 0.273<br>(0.251)     | 0.454<br>(0.293)     | 0.476*<br>(0.286)    | 0.424<br>(0.325)     | 0.431<br>(0.324)     |
| <i>min(g) * min(ToM)</i>                                                                                                           | -0.032*<br>(0.019)   | -0.032*<br>(0.019)   | -0.026<br>(0.020)    | -0.033*<br>(0.020)   | -0.053***<br>(0.019) | -0.053***<br>(0.020) | -0.052<br>(0.040)    | -0.049<br>(0.040)    | -0.066<br>(0.042)    | -0.062<br>(0.042)    | -0.052<br>(0.050)    | -0.053<br>(0.050)    |
| Round 1 Baseline                                                                                                                   | 0.000<br>(.)         | 0.000<br>(.)         | 0.000<br>(.)         | 0.000<br>(.)         | 0.000<br>(.)         | 0.000<br>(.)         | 0.000<br>(.)         | 0.000<br>(.)         | 0.000<br>(.)         | 0.000<br>(.)         | 0.000<br>(.)         | 0.000<br>(.)         |
| Round 2                                                                                                                            | -1.392***<br>(0.435) | -1.411***<br>(0.441) | -1.411***<br>(0.435) | -1.429***<br>(0.440) | -1.517***<br>(0.416) | -1.530***<br>(0.417) | -1.500***<br>(0.453) | -1.352***<br>(0.484) | -1.342***<br>(0.489) | -1.262**<br>(0.495)  | -1.251**<br>(0.493)  | -1.268**<br>(0.494)  |
| Round 3                                                                                                                            | -1.727***<br>(0.451) | -1.750***<br>(0.478) | -1.751***<br>(0.469) | -1.773***<br>(0.471) | -1.878***<br>(0.442) | -1.894***<br>(0.439) | -1.214***<br>(0.416) | -1.080**<br>(0.442)  | -1.074**<br>(0.450)  | -1.000**<br>(0.454)  | -0.992**<br>(0.456)  | -1.008**<br>(0.463)  |
| Round 4                                                                                                                            | -1.568***<br>(0.456) | -1.593***<br>(0.449) | -1.593***<br>(0.443) | -1.617***<br>(0.454) | -1.722***<br>(0.431) | -1.739***<br>(0.417) | -1.941***<br>(0.453) | -1.855***<br>(0.464) | -1.861***<br>(0.466) | -1.825***<br>(0.470) | -1.823***<br>(0.465) | -1.833***<br>(0.472) |
| Round 5                                                                                                                            | -1.905***<br>(0.401) | -1.928***<br>(0.414) | -1.930***<br>(0.411) | -1.952***<br>(0.417) | -2.069***<br>(0.393) | -2.087***<br>(0.388) | -2.269***<br>(0.461) | -2.182***<br>(0.469) | -2.186***<br>(0.471) | -2.152***<br>(0.480) | -2.145***<br>(0.479) | -2.157***<br>(0.484) |
| Round 6                                                                                                                            | -2.293***<br>(0.438) | -2.314***<br>(0.467) | -2.317***<br>(0.467) | -2.336***<br>(0.471) | -2.454***<br>(0.461) | -2.471***<br>(0.461) | -2.391***<br>(0.512) | -2.347***<br>(0.512) | -2.359***<br>(0.504) | -2.351***<br>(0.511) | -2.346***<br>(0.513) | -2.351***<br>(0.519) |
| Chat                                                                                                                               |                      | 0.005<br>(0.041)     | 0.004<br>(0.039)     | 0.009<br>(0.039)     | 0.020<br>(0.036)     | 0.024<br>(0.035)     |                      | -0.036<br>(0.038)    | -0.040<br>(0.038)    | -0.064<br>(0.040)    | -0.066<br>(0.041)    | -0.063<br>(0.046)    |
| Trust                                                                                                                              |                      |                      | 0.098<br>(0.088)     | 0.104<br>(0.085)     | 0.218**<br>(0.091)   | 0.212**<br>(0.090)   |                      |                      | -0.153<br>(0.101)    | -0.187*<br>(0.109)   | -0.170<br>(0.120)    | -0.165<br>(0.128)    |
| Religious Diversity                                                                                                                |                      |                      |                      | -0.364<br>(0.320)    | -1.380***<br>(0.432) | -1.569***<br>(0.556) |                      |                      |                      | 0.803**<br>(0.389)   | 0.664<br>(0.498)     | 0.664<br>(0.496)     |
| Ethnic Diversity                                                                                                                   |                      |                      |                      |                      | 1.536***<br>(0.421)  | 1.637***<br>(0.499)  |                      |                      |                      |                      | 0.258<br>(0.522)     | 0.242<br>(0.524)     |
| Gender                                                                                                                             |                      |                      |                      |                      |                      | 0.437<br>(0.705)     |                      |                      |                      |                      |                      | 0.196<br>(0.969)     |
| Constant                                                                                                                           | 1.025<br>(2.091)     | 0.996<br>(2.110)     | 2.287<br>(2.388)     | 2.232<br>(2.310)     | 0.098<br>(2.173)     | -0.079<br>(2.265)    | -5.239<br>(4.546)    | -4.920<br>(4.558)    | -8.171<br>(5.300)    | -8.892*<br>(5.151)   | -8.049<br>(5.803)    | -8.270<br>(5.768)    |
| N                                                                                                                                  | 162                  | 162                  | 162                  | 162                  | 162                  | 162                  | 150                  | 150                  | 150                  | 150                  | 150                  | 150                  |
| AIC                                                                                                                                | 103.909              | 105.903              | 107.509              | 109.230              | 108.075              | 109.975              | 128.960              | 130.622              | 131.715              | 132.146              | 134.028              | 136.007              |
| D                                                                                                                                  | 0.213                | 0.214                | 0.213                | 0.212                | 0.193                | 0.193                | 0.394                | 0.395                | 0.391                | 0.382                | 0.384                | 0.387                |

Note: Robust standard errors reported in parenthesis \* = significant at the 90% level, \*\* = significant at the 95% level, and \*\*\* = significant at the 99% level. Round 1 = base round to which other rounds are compared to. HLr1 to HLr6 represent 6 regression equations estimated hierarchically, adding one new predictor for each equation, for the condition in which participants go from high to low resource growth rates. LH r1 to LHr6 represent the condition in which participants go from low to high resource growth rates.

## 7 Supplementary Method 5

### 7.1 Resource Experiment Design

This experiment is focused on understanding how social and general intelligence affect group performance under changing environmental conditions. The experiment is based on the work of Janssen and colleagues [12]

The software used for this experiment is open-source and available at <http://commons.asu.edu>. However, the actual software has been modified to fit our experimental needs and modifications will be made publicly available in the near future.

To participate in our experiments, individuals need to release their ACT/SAT scores and perform a social intelligence test (see below). In the actual experiment, individuals are randomly assigned to groups of 4 and need to harvest tokens in a 20X20 grid. ACT/SAT scores served as our measure and proxy of  $g$ , and the short story test served as our measure and proxy of  $Tom$ .

Each token harvest is equal to \$0.02. Participants can see the whole grid and thus have information on how other individuals within their own group behave. However, they have no information on other groups participating in the experimental session. Further, participants are able to communicate with other group members between rounds and before the 1st round. Each round last 180 seconds and at the beginning of each round tokens fill 15% of the grid. Empty cells can generate token with probability  $p_{tok} = p_g * n_{tok} / N$  where  $p_g$  is the maximum growth rate (= 0.01 in case of high growth rate, and 0.005 in case of low growth rate),  $n_{tok}$  = the number of neighboring cells with tokens and  $N = 8$  representing the maximum number of neighboring cells that can have tokens. In other words, the more tokens are neighboring an empty cell, the higher the probability that the empty cell will generate tokens. If all neighboring cells are empty, no token will grow. Growth rate was always changed after round three, hence participants played three rounds with either low or high growth rate, and three rounds with high

360 or low growth rate.

## 361 **8 Supplementary Method 6**

### 362 **8.1 Recruitment for the Experiments**

363 We recruited 216 undergraduate students from two universities: Utah State University and the  
364 University of Texas at San Antonio. We recruited students at UTSA from the introductory  
365 psychology participation pool. The introductory psychology participation pool draws students  
366 from approximately 8 introductory psychology courses at over 100 students per course where  
367 students complete studies for partial credit toward course completion. These intro courses draw  
368 students from across the university. At USU, we recruited students from introductory sociology  
369 and anthropology courses that have over a 150 students enrolled per course. These courses are  
370 general requirement courses and draw students from all majors represented at the university.

371       Participation in the study was voluntary and students could withdraw participation at any  
372 time.

## 373 **9 Supplementary Method 7**

### 374 **9.1 Experiment Protocol**

375 To facilitate the replication of this work we provide the code used to run the experiment here:  
376 <https://bitbucket.org/tamnguyenthe/fip-game> We also provide a video of a round of the experi-  
377 mental session as a supplementary file.

378       Once individuals were seated at their experimental stations, the following instructions were  
379 given:

380       Welcome to the Packman Game. You have completed the consent form, and you are now  
381 ready to participate. Please give your best effort. You will receive academic credit for partici-

382 pating. In addition, based on your performance, you can also earn up to \$40. The experiment  
383 will take 1 to 1.5 hours, and is divided into three parts. In Part I you will complete an "eyes task".  
384 In Part II, you will play a foraging game. In Part III you will complete a "short story task" and  
385 answer a few questions on an exit survey. Please no talking during the experimental session.  
386 You must have completed the ACT or SAT and be 18 years or older to participate. Thank you  
387 for your participation!

388 No questions from participants were allowed during the experiment to minimize facilitator  
389 interference.

## 390 **9.2 Resource Growth Change Experiment**

391 Following are the instructions, as they appeared on screen before the actual token harvest ex-  
392 periment:

393 In this game you will earn money for collecting tokens. The amount of money you earn  
394 depends on your decisions AND the decisions of other people in this room over the course of  
395 playing a game described below.

### 396 **How to play**

397 You will appear on the screen as a yellow dot (avatar) with other individuals who will appear  
398 as avatars. You can move by pressing the four arrow keys on your keyboard.

399 You can move up, down, left, or right. You have to press a key for each and every move of  
400 your yellow dot. As you move around you can collect green diamond shaped tokens and earn  
401 two cents for each collected token. To collect a token, move your yellow dot over a green token  
402 and press the space bar. Simply moving your avatar over a token does NOT collect that token.

403 Between rounds of token collecting you will have 1 minute to chat via text box.

### 404 **Tokens**

405 The tokens that you collect have the potential to regenerate. After you have collected a

406 green token, a new token can re-appear on that empty cell. The rate at which new tokens appear  
407 depends on the number of adjacent cells with tokens. The more tokens in the eight cells that  
408 surround an empty cell, the faster a new token will appear on that empty cell. Existing tokens  
409 can generate new tokens. To illustrate this, please refer to Image 1 and Image 2. The middle  
410 cell in Image 1 denoted with an X has a greater chance of regeneration than the middle cell in  
411 Image 2. When all neighboring cells are empty, there is no chance for regeneration.

### 412 **Best Strategy**

413 The chance that a token will regenerate on an empty cell increases as there are more tokens  
414 surrounding it. Therefore, you want to have as many tokens around an empty cell as possible.  
415 However, you also need empty cells to benefit from this regrowth. The best arrangement of  
416 tokens that maximizes overall regrowth is the checkerboard diagram shown below. The slower  
417 the token regrowth, the more patient you must be in order for a token to reappear after harvest.

## 418 **10 Supplementary Method 8**

### 419 **Short Story Test**

420 In the Short Story Task (SST), participants read "The End of Something", a short story by Ernest  
421 Hemingway, which presents a nuanced interaction between a romantic couple in which the male  
422 protagonist, Nick, starts an argument and breaks up with his girlfriend, Marjorie. Through the  
423 course of the story, the characters display sarcasm, non-verbal and indirect communication,  
424 higher-order emotions like guilt, and attempts to hide their intentions and feelings from one  
425 another.

426 According to Dodell-Feder [2], the goal of the SST was to

427 "to design a new ToM task (the Short Story Task -SST-) that improved upon the  
428 limitations of existing ToM measures. More specifically, we aimed to create a task



429 that (a) was sensitive to individual differences in ToM ability and did not suffer from  
430 ceiling effects, (b) incorporated a range of mental states of differing complexity,  
431 including epistemic states, affective states, and intentions to be inferred from a first-  
432 and second-order level, (c) used ToM stimuli representative of real-world social  
433 interactions, (d) required participants to utilize social context when making mental  
434 state inferences, (e) exhibited adequate psychometric properties, and (f) was quick  
435 and easy to administer and score.” [2, p. 2]

### 436 **10.0.1 Short Story Test instruction and questions**

#### 437 **Instructions to Participant**

438 Now you are going to read a short story called The End of Something. The story is only  
439 a few pages, but take your time reading it. Try to get a sense of what happens and what the  
440 relationships are between the characters. After you’re finished, some questions will appear on  
441 the screen and you will be asked to answer them.

#### 442 **After story is read**

443 1. Have you read this story before? [yes — no]

#### 444 • IF YES

- 445 – How long ago did you read it?
- 446 – How well do you remember the story?
- 447 – Did you read it for school or pleasure?

#### 448 \* IF SCHOOL

- 449 · What grade were you in?
- 450 · What class was it for?

451 2. Is the story familiar to you? [yes — no]

452

- IF YES

453

- Do you know anything about the story? What do you know about it?

454

- Have you discussed the story with anyone?

455

**Instructions to Participant** Now I'm going to ask you some questions about the story.

456

Here is a copy of the questions I'll be asking so you can read along. For most of the questions,

457

there are no right or wrong answers and the questions can be answered with short responses.

458

We're also interested in the character's thoughts, feelings and intentions when it applies to the

459

question.

460

### **Questions**

461

1. In just a few sentences, how would you summarize the story

462

2. What do Nick and Marjorie observe on the shoreline as they are rowing to the point to set

463

their fishing lines?

464

3. What does Nick mean when he says, "They aren't striking?"

465

4. Nick and Marjorie have a pail of perch for what purpose?

466

5. Do Marjorie's actions suggest that she is experienced or inexperienced at fishing? What

467

makes you say that?

468

6. Why does Nick say to Marjorie, "You know everything"?

469

7. Why does Marjorie reply, "Oh Nick, please cut it out! Please, please don't be that way!"?

470

8. Why is Nick afraid to look at Marjorie?

471

9. What does Nick mean when he says, "It isn't fun anymore"?

- 472 10. Why does Marjorie sit with her back toward Nick when she asks, "Isn't love any fun?"?
- 473 11. Why does Marjorie take the boat and leave and what is she feeling at that moment?
- 474 12. Who is Bill and what does he reveal when he asks Nick, "Did she go alright? ... Have a  
475 scene?"?
- 476 13. What is Nick feeling when he says, "Oh, go away, Bill! Go away for a while"?
- 477 14. The story is called "The End of Something." What is the title referring to?

#### 478 **10.0.2 Scoring the Short Story Test**

479 Scoring for the SST according to [29]. Three different coders coded the answer to the SST in-  
480 dependently. We calculated Krippendorff's alpha using ordinal data using ReCal online. Krip-  
481 pendorff's alpha (ordinal) was 0.833, demonstrating a high level of coders agreement. As the  
482 SST was consistently coded with three coders, all questions that did not have 100% agreement  
483 among coders was coded as the score issued by the majority of coders. If a question did not  
484 have a majority (all coders issued different scores) disagreements were resolved via discussion  
485 between all coders.

486 The following is the coding sheet used by the coders. Explicit mental state reasoning (in  
487 bold) is the metric used to assess Social Intelligence.

- 488 ● Comprehension: Sum scores of 5 comprehension questions (questions 2, 3, 4, 5, and 14).  
489 Ranges from 0 to 10.
- 490 ● **Explicit mental state reasoning**: Sum scores of 8 mental state reasoning questions (ques-  
491 tions 6, 7, 8, 9, 10, 11, 12, and 13). Ranges from 0 to 16.
- 492 ● Spontaneous mental state inference: 1 score for spontaneous mental state question (ques-  
493 tion 1). Ranges from 0 to 1.

494 Following are examples of coding used to evaluate and score the three components of the  
495 test described above.

- 496 • Question 1: 1 = any mental state inference, even if it is wrong
- 497 • Question 2: 2 = any adjective + mill 1 = only mill 0 = anything else
- 498 • Question 5: 2 = experienced 2 or 1 = somewhat experienced / somewhat inexperienced  
499 2 for good justification 1 for bad / no justification 1 or 0 = inexperienced 1 for good  
500 justification 0 for bad / no justification
- 501 • Question 6: 0 = anything that does not understand that he's being sarcastic, anything that  
502 thinks he's joking, anything that thinks that she does actually know everything
- 503 • Question 7: 2 = if they understood that he was giving her a hard time or doing something  
504 that was not intended to make her happy
- 505 • Question 8: 2 = anything that references her reaction / emotions 1 = anything that refer-  
506 ences his reaction / emotions without referencing hers 0 = no mention of an emotion
- 507 • Question 10: 2 = knows about break up / something bad (may include emotion) 1 =  
508 emotion with no knowledge of breakup / something bad 0 = No emotion, No knowledge  
509 about break up / something bad
- 510 • Question 11: 2 = (either the relationship is over or wanting space) AND negative emotion  
511 1= upset OR wants space
- 512 • Question 12: 2 = Bill's relationship with Nick AND anything that references Bill's ad-  
513 vanced knowledge 1 = Bill's relationship with Nick OR directly states Bill knew Nick  
514 was going to break up with Marjorie (Bill is not in the clearing while Nick and Marjorie  
515 fight and/or break up. He enters later.)

- 516 • Question 13: 2 = negative emotion referencing break up AND needs space / doesn't want  
517 to talk 1 = negative emotion 0 = no negative emotion, only wants space
- 518 • Miscellaneous: As long as a correct answer is present (even if a patently wrong answer  
519 is also present), give the score for the correct answer. Anything that is obviously wrong  
520 (outside of question 1) should be scored as 0.

## 521 **11 Supplementary Method 9**

### 522 **11.1 Survey**

523 Following is the exit survey.

- 524 1. Please report your age in years.
- 525 2. Please provide your current GPA
- 526 3. Please describe your religious affiliation, if any. Please be as specific as possible.
- 527 4. What is your primary language?
- 528 5. Please specify how you identify your race or ethnicity.
- 529 6. Please indicate the number of individuals who you call close friends? Please exclude  
530 family members and mere acquaintances.
- 531 7. How many individuals are in your total social network (i.e., close friends plus family  
532 members plus acquaintances)?
- 533 8. Please write the typical number of individuals who lived in your home while you were  
534 between the ages of 5-17?

535 9. Please estimate the median household income of the family in which you lived between  
536 ages of 5-17?

537 10. What is your college major or intended college major?

538 11. Please circle the descriptor that best describes your biological sex?

539 • M

540 • F

541 12. Did you understand the instructions of the exercises?

542 • I did not understand anything I understood only a bit of the instructions

543 • I understood half of the instructions

544 • I understood most of the instructions

545 • I understood everything

546 13. Do you think most people would try to take advantage of you if they had a chance, or  
547 would they try to be fair?

548 • Would take advantage of you

549 • Depends on situation

550 • Would try to be fair

551 14. Would you say that most of the time people try to be helpful, or that they are mostly just  
552 looking out for themselves?

553 • Try to be helpful

554 • Depends on situation

555           • Mostly just looking out for themselves

556 15. Generally speaking, would you say that most people can be trusted or that you can't be  
557 too careful in dealing with people?

558           • Most people can be trusted

559           • Depends on situation

560           • Can't be too careful in dealing with people

561 16. In the past year, did you do any volunteer activity through organizations; i.e. donate your  
562 time and energy not for pay?

563           • Yes

564           • No

565 17. Global warming is a fact and is mostly caused by emissions from vehicles and industrial  
566 facilities?

567           • I completely agree

568           • I somewhat agree

569           • I have no opinion

570           • I somewhat disagree

571           • I completely disagree

572 18. Tell me whether the first statement or the second statement comes closer to your own  
573 views ? even if neither is exactly right.

574           • Most people who want to get ahead can make it if they're willing to work hard.

- 575           • Hard work and determination are no guarantee of success for most people.
- 576 19. Tell me whether the first statement or the second statement comes closer to your own  
577 views ? even if neither is exactly right.
- 578           • The government should do more to help needy Americans, even if it means going  
579 deeper into debt.
- 580           • The government today can't afford to do much more to help the needy
- 581 20. Here are two statements people sometimes make when discussing the environment and  
582 economic growth. Which of them comes closer to your own point of view?
- 583           • Protecting the environment should be given priority, even if it causes slower eco-  
584 nomic growth and some loss of jobs.
- 585           • Economic growth and creating jobs should be the top priority, even if the environ-  
586 ment suffers to some extent.
- 587 21. What is the highest educational level that your Parents have attained?
- 588 22. What is your Father's occupation?
- 589 23. What is your Mother's occupation?

## 590 **12 Supplementary References**

### 591 **References**

- 592 [1] Coyle, T. R. & Pillow, D. R. Sat and act predict college gpa after removing g. *Intelligence*  
593 **36**, 719–729 (2008).



- 594 [2] Dodell-Feder, D., Lincoln, S. H., Coulson, J. P. & Hooker, C. I. Using fiction to assess  
595 mental state understanding: A new task for assessing theory of mind in adults. *PLoS ONE*  
596 **8**, 1–14 (2013).
- 597 [3] Hardin, G. The tragedy of the commons. *Science* **162**, 1243–48 (1968).
- 598 [4] Berkes, F., Feeny, D., McCay, B. J. & Acheson, J. M. The benefits of the commons.  
599 *Nature* **340**, 91 (1989).
- 600 [5] Dietz, T. Struggle to Govern the Commons. *Science* **302**, 1907–1912 (2003).
- 601 [6] Ostrom, E. *Governing the commons: The evolution of institutions for collective action*  
602 (Cambridge University Press, 1990).
- 603 [7] Baggio, J. A. *et al.* Explaining success and failure in the commons: the configural nature  
604 of Ostrom’s institutional design principles. *International Journal of the Commons* **10**,  
605 417–439 (2016).
- 606 [8] Barnett, A. *et al.* An iterative approach to case study analysis: Insights from qualitative  
607 analysis of quantitative inconsistencies. *International Journal of the Commons* **10** (2016).
- 608 [9] Cox, M., Arnold, G. & Tomás, S. V. A Review of Design Principles for Community-based  
609 Natural Resource. *Ecology and Society* **15**, 38 (2010).
- 610 [10] Freeman, J., Coyle, T. R. & Baggio, J. A. The functional intelligences proposition. *Per-*  
611 *sonality and Individual Differences* **99**, 46–55 (2016).
- 612 [11] Nettle, D. & Liddle, B. Agreeableness is related to social-cognitive, but not social-  
613 perceptual, theory of mind. *European Journal of Personality* **22**, 323–335 (2008).

614 [12] Janssen, M. A., Holahan, R., Lee, A. & Ostrom, E. Lab experiments for the study of  
615 social-ecological systems. *Science* **328**, 613–617 (2010).
